# Supplementary material for: Pathway-based Bayesian inference of drug–disease interactions
Source: Royal Society of Chemistry journal article supplement (doi:10.1039/c4mb00014e), 2014-04-03
Supplement: c4mb00014e1.xlsx [file c4mb00014e1.xlsx]

## Sheet: Sheet1
Correlation	KEGG pathway ID pair		Number of shared genes	min p-value	Number of drugs (p-values < 0.05) out of 1169 drugs	Number of drugs (p-values < 0.01) out of 1169 drugs
0.535727	860	4066	1	0.00537634	352	8
0.534394	5145	5160	15	2.34961e-11	953	752
0.32657	5160	5214	13	3.43659e-10	952	785
0.321027	3020	5142	0	-	-	-
0.311168	5142	5220	10	1.20813e-14	947	742
0.266132	3420	3440	7	7.37121e-08	608	287
0.246455	5161	5220	21	1.09278e-14	1094	1002
0.236917	591	5161	0	-	-	-
0.233612	5145	5223	5	4.10107e-07	485	267
0.232195	4064	4664	3	0.00129282	43	5
0.229848	5142	5214	5	7.0405e-08	588	284
0.229619	5140	5160	6	1.17468e-05	187	85
0.225917	980	5204	30	1.12295e-17	1127	1098
0.221271	4912	5160	6	0.000340276	55	16
0.213975	5142	5219	1	0.012012	36	0
0.20872	5161	5214	14	3.0393e-10	813	568
0.199192	5145	5220	9	9.56843e-12	851	690
0.197518	4110	4115	9	1.92963e-08	678	498
0.191093	5160	5161	37	4.47171e-13	1091	1021
0.187674	5142	5223	5	7.0405e-08	602	283
0.181823	590	860	0	-	-	-
0.1797	4914	4915	13	1.81799e-11	930	775
0.178174	5020	5140	1	0.00539084	53	2
0.163521	5160	5220	15	2.27913e-11	1001	917
0.160453	5133	5166	6	0.00136073	29	5
0.155516	3020	5160	0	-	-	-
0.1551	591	5020	0	-	-	-
0.153807	5140	5218	1	0.00606061	43	1
0.153189	5020	5161	3	0.00460769	30	2
0.14714	5142	5145	25	2.3938e-15	1104	1012
0.145424	4370	5322	0	-	-	-
0.144647	4664	5161	12	1.54978e-08	547	417
0.143621	5160	5223	12	3.43659e-10	887	701
0.143345	5216	5220	6	1.89006e-08	821	356
0.139579	3020	5220	0	-	-	-
0.139011	5145	5218	5	4.10107e-07	398	245
0.137269	640	5142	0	-	-	-
0.137166	5160	5213	13	4.17189e-10	863	729
0.134031	592	5145	0	-	-	-
0.13338	5161	5213	11	1.08681e-08	701	499
0.128289	5020	5160	1	0.0224719	5	0
0.127141	591	5140	0	-	-	-
0.123243	5210	5220	12	7.83746e-14	1081	911
0.123181	4151	5166	20	7.49224e-07	537	265
0.122997	5145	5213	5	4.10107e-07	423	249
0.121563	830	5164	0	-	-	-
0.119341	4912	5220	6	2.12959e-06	140	55
0.118692	5161	5330	1	0.0249307	4	0
0.118484	4064	5020	0	-	-	-
0.117707	5212	5216	3	1.25996e-05	584	134
0.11677	510	5110	0	-	-	-
0.115997	3020	5210	0	-	-	-
0.115923	5145	5214	5	4.10107e-07	470	265
0.115887	5161	5210	14	7.00285e-10	834	675
0.114846	5020	5322	9	5.01639e-05	167	42
0.112207	5161	5223	13	4.77692e-10	705	476
0.110595	280	5322	0	-	-	-
0.109548	4115	5340	0	-	-	-
0.108126	10	500	8	1.49712e-05	423	65
0.106328	5020	5210	2	0.00225728	63	6
0.105121	640	5160	0	-	-	-
0.105108	5142	5210	9	3.55111e-08	714	510
0.103531	4064	5216	0	-	-	-
0.102948	20	1200	13	1.43825e-10	988	699
0.102545	4960	5031	1	0.0127389	1	0
0.102517	4115	5217	0	-	-	-
0.102508	591	4064	0	-	-	-
0.102489	4915	5161	16	4.74052e-09	850	746
0.102336	51	4115	0	-	-	-
0.102184	3440	5211	0	-	-	-
0.101898	640	5020	0	-	-	-
0.101881	830	4115	0	-	-	-
0.0995159	4064	5145	15	9.34917e-09	747	596
0.0989787	410	5161	0	-	-	-
0.0984076	5142	5161	20	4.02248e-12	1002	928
0.0983975	3440	4210	0	-	-	-
0.0975968	10	5161	0	-	-	-
0.0965182	3020	5214	0	-	-	-
0.0959674	4064	5160	10	1.35482e-10	826	593
0.0953401	5161	5219	10	1.71179e-08	698	412
0.0944363	20	5160	0	-	-	-
0.0929324	4064	5220	3	4.31766e-05	230	125
0.0928791	5203	5322	26	2.24248e-12	1039	920
0.0925012	3440	5203	0	-	-	-
0.0917096	10	4912	0	-	-	-
0.0916277	760	830	0	-	-	-
0.0913518	3020	5145	0	-	-	-
0.0905026	4350	4390	13	2.41706e-10	858	763
0.0899394	51	830	0	-	-	-
0.0894617	592	5220	0	-	-	-
0.088847	4960	5221	4	2.22182e-06	548	180
0.0878956	3020	5223	0	-	-	-
0.0878327	5214	5216	5	4.41013e-08	699	335
0.0877335	510	4141	4	0.000391975	110	44
0.0875747	4115	4964	0	-	-	-
0.0873796	4064	5322	2	0.0874092	0	0
0.0872511	10	4070	0	-	-	-
0.0870114	592	5140	0	-	-	-
0.0869767	5160	5216	4	3.76493e-05	365	126
0.0868657	52	590	0	-	-	-
0.086811	4660	5322	4	0.0770837	0	0
0.0868095	5020	5145	2	0.000779098	76	8
0.0865325	240	562	0	-	-	-
0.0863383	10	3430	0	-	-	-
0.0861343	3430	4114	0	-	-	-
0.0840353	190	3010	0	-	-	-
0.0835333	4664	5020	2	0.00225728	77	8
0.0834206	860	5221	0	-	-	-
0.0828488	860	5322	0	-	-	-
0.0824595	4140	4915	0	-	-	-
0.0823926	640	860	0	-	-	-
0.0820233	5218	5223	14	3.04606e-14	1050	923
0.0819799	3008	4110	0	-	-	-
0.081451	480	590	4	0.000275979	139	14
0.0808295	5140	5223	1	0.00607903	52	3
0.0806219	5145	5216	1	0.0121212	34	0
0.080421	330	4151	1	1	0	0
0.0802848	10	5217	0	-	-	-
0.0800551	5160	5219	8	2.37295e-07	632	415
0.0797153	5215	5221	15	1.77286e-13	1028	868
0.0793615	4622	5164	27	3.74984e-09	872	731
0.0780035	5034	5133	4	0.00422226	4	1
0.0775713	590	4978	0	-	-	-
0.0773888	592	5219	0	-	-	-
0.0771243	100	650	0	-	-	-
0.0770669	830	5133	0	-	-	-
0.0766903	3060	4141	5	4.20852e-05	378	69
0.0765799	920	4150	0	-	-	-
0.076461	5162	5164	46	2.22281e-20	1164	1158
0.0758512	5219	5220	11	3.82944e-10	1008	745
0.0758391	4960	5133	1	0.00727273	57	3
0.0757832	3430	4350	0	-	-	-
0.0755525	10	4151	4	0.00744916	28	3
0.0750797	4064	5161	8	1.12676e-06	510	321
0.0749972	5213	5220	13	1.23985e-12	1073	879
0.0749547	4914	5161	9	1.13785e-06	362	233
0.0746604	920	5215	0	-	-	-
0.0746181	4350	5162	1	0.162414	0	0
0.0743967	380	3440	0	-	-	-
0.0743049	564	5322	0	-	-	-
0.0741565	562	5169	2	0.000424628	68	10
0.074058	4114	4914	22	1.13501e-16	1107	979
0.0738661	4622	5160	26	8.44047e-11	931	782
0.0731652	3430	5322	0	-	-	-
0.0730872	10	260	4	0.000144587	445	77
0.072968	4064	5217	0	-	-	-
0.0729285	3430	4140	0	-	-	-
0.0728954	760	5161	0	-	-	-
0.0726458	5140	5213	1	0.00606061	40	2
0.0723839	5161	5217	0	-	-	-
0.0723523	5142	5216	1	0.00909091	43	1
0.0723037	5142	5213	5	7.0405e-08	538	280
0.0722803	40	280	1	0.00286533	50	11
0.0722782	330	5322	0	-	-	-
0.0720901	500	5132	0	-	-	-
0.0720641	3460	5322	0	-	-	-
0.0719507	3420	5322	0	-	-	-
0.0713736	240	983	9	4.90338e-07	514	216
0.0713136	3430	3460	4	6.34432e-05	175	25
0.0710967	4110	5340	0	-	-	-
0.0710916	240	590	0	-	-	-
0.070991	20	5161	0	-	-	-
0.0709859	4115	5211	0	-	-	-
0.0709027	5131	5217	0	-	-	-
0.0707891	564	4914	0	-	-	-
0.0707881	531	563	0	-	-	-
0.0706628	1200	5020	0	-	-	-
0.0706357	5210	5223	9	4.56909e-13	986	708
0.0706272	4910	5166	10	2.01657e-06	428	193
0.0699728	4622	5203	5	2.91733e-05	243	80
0.0693923	340	830	0	-	-	-
0.0693303	10	5031	0	-	-	-
0.0689853	5031	5133	3	0.000149712	83	7
0.0686479	4964	5217	0	-	-	-
0.0685335	4350	5221	3	8.97092e-06	234	85
0.0685132	30	280	0	-	-	-
0.0683694	4140	4668	0	-	-	-
0.0682266	562	4070	25	6.58418e-23	1157	1140
0.068167	5166	5221	11	2.09775e-08	615	347
0.0680404	830	4972	0	-	-	-
0.0679208	920	5100	0	-	-	-
0.0677483	590	4066	0	-	-	-
0.0675249	4350	4623	0	-	-	-
0.0675202	10	5214	0	-	-	-
0.067406	4520	4960	1	0.00911854	44	2
0.067126	3030	5222	0	-	-	-
0.0670871	4115	4146	0	-	-	-
0.0669362	10	5020	0	-	-	-
0.0668507	480	860	0	-	-	-
0.0668461	830	5221	0	-	-	-
0.066663	4064	5142	11	2.64435e-09	781	638
0.0665996	591	4664	2	0.00588235	208	15
0.0665694	3440	4914	0	-	-	-
0.0665239	4668	4960	4	1.75992e-06	439	150
0.0662887	4350	5211	3	9.98156e-05	145	35
0.0662642	5133	5161	11	1.85035e-08	361	234
0.0662002	240	4066	0	-	-	-
0.0661786	4115	4380	0	-	-	-
0.0661438	3015	4115	0	-	-	-
0.0661073	5204	5214	0	-	-	-
0.0661015	4110	5222	6	2.08124e-06	309	139
0.0658025	4530	5416	10	9.69819e-06	139	39
0.0657854	3030	4066	0	-	-	-
0.0657074	250	280	0	-	-	-
0.0656728	4668	5322	1	0.19109	0	0
0.0655772	830	4070	0	-	-	-
0.0655489	260	5221	0	-	-	-
0.065402	10	4910	10	0.000229956	146	54
0.0651279	4350	5222	2	0.00507582	17	1
0.0651111	4110	5322	0	-	-	-
0.0650907	830	5166	0	-	-	-
0.0650631	590	620	0	-	-	-
0.0650018	5142	5330	6	3.67993e-06	196	24
0.064945	4930	5222	3	7.32429e-07	469	126
0.0649181	250	5166	0	-	-	-
0.0646696	5140	5219	1	0.00539084	60	4
0.0646642	10	4930	5	2.12759e-05	271	51
0.0643995	10	4916	0	-	-	-
0.0642404	4912	5214	8	2.43381e-07	264	82
0.0641495	512	4350	0	-	-	-
0.0641253	4350	4930	2	0.0107527	53	0
0.0637913	4664	5142	7	2.15534e-08	513	299
0.0635568	250	5152	0	-	-	-
0.0635417	3440	5010	0	-	-	-
0.0634288	860	4370	0	-	-	-
0.0633579	3440	4330	0	-	-	-
0.063349	4540	5412	1	0.00506329	267	12
0.0630076	592	5218	0	-	-	-
0.0629081	280	3440	0	-	-	-
0.0628558	5030	5323	0	-	-	-
0.0627458	510	531	0	-	-	-
0.0626053	280	3030	0	-	-	-
0.0625594	5140	5161	10	1.46712e-07	582	404
0.0625128	565	590	11	3.78634e-09	807	436
0.062418	4915	5031	9	1.3515e-10	901	515
0.0624109	563	920	0	-	-	-
0.0623566	3030	5211	0	-	-	-
0.0623364	4960	5161	5	1.09846e-05	392	145
0.0622876	280	500	0	-	-	-
0.0622178	5216	5218	5	1.89006e-08	689	276
0.0621504	4110	5217	1	0.0251386	19	0
0.0621096	590	3440	0	-	-	-
0.0620245	5218	5220	14	6.14356e-14	1073	872
0.0619577	5168	5221	2	0.00251059	48	10
0.0618817	640	5220	0	-	-	-
0.0617247	310	3440	0	-	-	-
0.0616636	500	3030	0	-	-	-
0.061608	562	4260	0	-	-	-
0.0615029	4915	5217	0	-	-	-
0.0614431	3030	4140	0	-	-	-
0.0613739	10	5166	0	-	-	-
0.0613135	592	5223	0	-	-	-
0.0612712	5110	5211	0	-	-	-
0.0611466	562	601	0	-	-	-
0.060943	4064	5133	10	8.85255e-11	540	346
0.0608939	4664	5220	11	7.43252e-10	824	522
0.0608187	5166	5203	24	8.23273e-08	765	479
0.06069	4912	4915	17	1.13031e-12	1033	851
0.060603	4914	5132	2	0.000552608	28	2
0.0604264	4912	5210	4	0.000245654	43	11
0.0604049	3420	4115	1	0.0104167	17	0
0.0603467	5214	5220	17	8.98892e-16	1093	959
0.0602817	591	640	0	-	-	-
0.0601571	5131	5215	4	2.37376e-06	465	188
0.0600057	280	5164	0	-	-	-
0.0599812	5217	5222	0	-	-	-
0.0599412	410	5220	0	-	-	-
0.0599042	5212	5220	15	3.5696e-15	1110	985
0.0597604	3022	3420	8	2.94541e-08	678	511
0.0597189	591	5160	0	-	-	-
0.0596959	100	260	0	-	-	-
0.0596776	4915	5216	4	1.20502e-05	200	34
0.0594966	4664	4912	10	1.48022e-08	486	245
0.0593757	601	4340	0	-	-	-
0.0593682	260	860	2	0.0026738	319	35
0.0593599	4730	5215	7	5.29871e-08	729	359
0.0593276	4380	5166	18	8.79098e-08	948	699
0.059273	650	3440	0	-	-	-
0.0591542	4010	4380	17	1.91048e-07	622	359
0.0591488	830	4151	0	-	-	-
0.0590115	5110	5222	0	-	-	-
0.058997	4115	5031	0	-	-	-
0.0589097	4151	5202	10	0.000605982	85	23
0.0588346	860	5140	0	-	-	-
0.0587351	600	5110	0	-	-	-
0.0586289	5160	5164	39	7.68884e-16	1148	1131
0.0585982	4720	5215	8	1.00418e-07	834	458
0.058576	590	4910	0	-	-	-
0.0585491	330	3008	0	-	-	-
0.0585059	1200	5140	0	-	-	-
0.0583733	71	5211	0	-	-	-
0.0582591	520	4141	0	-	-	-
0.058218	4370	4916	6	5.11101e-06	156	42
0.0581824	4664	5216	4	6.08453e-07	250	49
0.0581175	5162	5166	19	8.78206e-07	604	363
0.0580873	3440	4390	0	-	-	-
0.0580724	4350	4668	2	0.0329196	2	0
0.0580294	4380	5322	5	0.0835355	0	0
0.0579548	100	4914	0	-	-	-
0.0579445	4913	5204	2	0.000971131	406	12
0.0578482	10	4914	0	-	-	-
0.0577769	4350	5203	4	0.00617126	35	2
0.0577697	4115	5322	0	-	-	-
0.0577444	5164	5166	17	1.25151e-06	481	251
0.0575783	562	4915	2	0.0001628	179	75
0.0573813	5212	5217	0	-	-	-
0.0572145	240	860	0	-	-	-
0.0569317	3008	4144	0	-	-	-
0.0569176	830	5161	0	-	-	-
0.0569123	531	5166	0	-	-	-
0.0569049	51	4630	0	-	-	-
0.056803	51	4141	0	-	-	-
0.0567121	3430	4110	1	0.0145985	23	0
0.0566668	4960	5215	5	2.19642e-06	558	188
0.056548	51	5322	0	-	-	-
0.056545	590	5014	1	0.00537634	25	3
0.0565189	4141	4916	0	-	-	-
0.0564896	3430	5215	0	-	-	-
0.0563449	640	3020	0	-	-	-
0.0563427	3430	5166	5	1.1736e-05	307	159
0.0561291	1230	4914	0	-	-	-
0.0560725	4978	5031	0	-	-	-
0.0560621	830	4350	0	-	-	-
0.0559848	860	4964	0	-	-	-
0.0559351	4350	5110	0	-	-	-
0.0559333	10	4722	0	-	-	-
0.0559091	860	5131	0	-	-	-
0.0558773	5020	5218	2	0.000687377	82	6
0.0558146	4914	5160	9	9.6225e-08	655	419
0.0557902	52	5166	0	-	-	-
0.0557714	3013	4110	0	-	-	-
0.0557555	601	3440	0	-	-	-
0.055685	5130	5166	1	0.0384615	7	0
0.0556278	5161	5215	21	1.8359e-14	1116	1019
0.0556224	5110	5217	0	-	-	-
0.0555903	591	5219	0	-	-	-
0.0555725	10	4721	0	-	-	-
0.0555538	3020	5219	0	-	-	-
0.0554892	5031	5322	1	0.177591	0	0
0.055479	601	5211	0	-	-	-
0.0554565	562	3460	0	-	-	-
0.0554542	4664	5145	8	9.29754e-09	728	531
0.0553454	620	4960	0	-	-	-
0.0553272	970	5322	0	-	-	-
0.0553114	4114	5132	1	0.00636943	28	1
0.0552778	3008	5203	0	-	-	-
0.0552596	5200	5412	8	3.82527e-05	253	87
0.055249	5110	5221	0	-	-	-
0.0552461	4915	4940	0	-	-	-
0.0550578	830	5134	0	-	-	-
0.0549519	100	4150	0	-	-	-
0.0549364	601	5131	0	-	-	-
0.054935	4151	5152	21	0.000491787	143	42
0.0548781	4151	4910	24	1.04841e-09	880	671
0.0548424	620	830	0	-	-	-
0.0547555	510	3440	0	-	-	-
0.0546862	4960	5168	0	-	-	-
0.0546649	4151	5162	32	1.54645e-10	922	691
0.0545785	4010	4350	5	0.00158412	84	13
0.054408	3020	5140	0	-	-	-
0.0543923	10	5131	0	-	-	-
0.0543824	380	5132	0	-	-	-
0.0542003	3022	4350	0	-	-	-
0.0542003	620	3430	0	-	-	-
0.0541548	4915	5320	0	-	-	-
0.0541373	380	4151	0	-	-	-
0.0540792	3420	5217	0	-	-	-
0.0539972	600	830	0	-	-	-
0.0539346	4914	5214	9	1.2565e-12	967	692
0.0539205	4964	5132	0	-	-	-
0.053855	5131	5212	4	2.71427e-06	370	102
0.0536512	3008	3060	0	-	-	-
0.0535917	4660	5221	12	1.39644e-10	805	595
0.0535507	860	4064	0	-	-	-
0.0535272	260	4066	0	-	-	-
0.0535105	5132	5217	0	-	-	-
0.0534636	563	5412	0	-	-	-
0.0533871	4260	5410	19	6.34279e-10	613	306
0.0532977	920	3440	0	-	-	-
0.0532959	1200	5219	0	-	-	-
0.0532744	4064	5131	3	1.24398e-05	354	138
0.0532076	830	4670	0	-	-	-
0.0531876	4115	4668	1	0.0125	22	0
0.0531385	512	830	0	-	-	-
0.0530761	565	5131	0	-	-	-
0.0530708	410	5216	0	-	-	-
0.0528727	4540	5161	7	1.74018e-05	83	43
0.0526789	4915	5414	5	3.58266e-07	583	364
0.0526574	4915	5143	1	0.00486618	294	16
0.05259	3030	3440	7	5.25916e-09	676	354
0.0524256	4064	4370	2	0.0039376	49	2
0.0523908	3030	4915	0	-	-	-
0.0523232	100	280	0	-	-	-
0.0522817	3410	3460	0	-	-	-
0.0522668	240	5131	0	-	-	-
0.0521846	71	650	5	4.10884e-07	595	274
0.0521514	250	860	0	-	-	-
0.0521372	4115	4720	0	-	-	-
0.0521353	510	4142	0	-	-	-
0.0521171	5034	5322	48	3.97921e-36	1165	1163
0.0521082	4115	5110	0	-	-	-
0.0521077	590	4151	0	-	-	-
0.0520557	600	5215	0	-	-	-
0.0520526	562	600	0	-	-	-
0.0520296	4390	5221	2	0.0163384	17	0
0.0519915	640	4066	1	0.0209974	2	0
0.0519668	5031	5212	0	-	-	-
0.0518821	4141	5110	5	2.30028e-05	216	99
0.0518771	4350	5161	5	8.2153e-05	161	60
0.0518164	5210	5212	13	2.46115e-14	1111	998
0.0518038	3440	4115	0	-	-	-
0.0517064	5132	5221	2	0.00120536	97	11
0.0516567	4540	4622	0	-	-	-
0.0516129	563	4142	0	-	-	-
0.0514694	830	4975	1	0.00273224	138	26
0.0514188	600	3030	0	-	-	-
0.0513867	410	5214	0	-	-	-
0.051385	640	5140	0	-	-	-
0.0513716	531	4370	0	-	-	-
0.0512983	4070	4540	2	0.00884956	63	3
0.0512967	920	4914	0	-	-	-
0.0512414	591	5218	0	-	-	-
0.051214	4115	4151	4	0.00147285	152	23
0.0512116	4962	5166	3	9.91166e-05	214	58
0.0511939	4668	5133	8	3.15451e-05	242	141
0.0510983	600	5217	0	-	-	-
0.0510832	3430	4668	0	-	-	-
0.0510748	4914	5220	9	9.33015e-11	854	651
0.0510673	5134	5322	2	0.00596701	35	1
0.0510436	5211	5340	0	-	-	-
0.0510165	280	4370	0	-	-	-
0.0510124	3440	5212	0	-	-	-
0.050991	563	5203	0	-	-	-
0.0509733	4914	5134	0	-	-	-
0.0509656	4660	5161	16	2.44542e-10	802	669
0.05088	5133	5322	9	1.19063e-05	170	76
0.0508687	4721	5221	0	-	-	-
0.0508374	280	650	9	6.10073e-09	765	513
0.0508327	983	5211	0	-	-	-
0.0507696	3022	5168	10	1.04433e-08	801	543
0.0507471	4070	4914	3	7.16961e-05	183	87
0.0507297	380	5211	0	-	-	-
0.0506462	4330	5132	0	-	-	-
0.0505559	10	5142	0	-	-	-
0.0505116	830	4066	0	-	-	-
0.0504686	4340	5211	0	-	-	-
0.050467	4962	5212	0	-	-	-
0.0504578	3030	4911	0	-	-	-
0.0504498	10	563	0	-	-	-
0.0504012	240	4150	0	-	-	-
0.0503725	563	3430	0	-	-	-
0.0503467	10	4064	0	-	-	-
0.0502848	534	5211	0	-	-	-
0.0501831	5110	5203	3	0.00139269	136	36
0.0501611	592	5142	0	-	-	-
0.0500628	280	563	0	-	-	-
0.0500583	4914	5217	0	-	-	-
0.0500276	4064	5215	3	1.24398e-05	215	115
0.0500024	3440	5168	0	-	-	-
0.04999	920	4964	0	-	-	-
0.0499032	280	4146	2	0.000177683	351	93
0.0498885	4010	5166	23	1.54369e-07	979	750
0.0498703	3460	5203	0	-	-	-
0.0498577	4540	4962	3	1.18454e-06	585	244
0.049834	5131	5211	1	0.0109739	26	0
0.0498241	4510	5132	3	0.00158727	13	5
0.0498049	10	4664	0	-	-	-
0.049706	4930	5031	0	-	-	-
0.0496878	3430	5340	0	-	-	-
0.0496445	830	5034	0	-	-	-
0.0496434	510	4390	0	-	-	-
0.0495943	562	4914	1	0.0126782	51	0
0.0495862	4914	5211	9	2.13454e-10	870	657
0.0495759	920	4151	0	-	-	-
0.0495709	4064	4070	1	0.0164381	11	0
0.049514	4370	5221	9	2.59524e-09	774	427
0.0494631	4141	4978	0	-	-	-
0.049428	3040	5132	0	-	-	-
0.0494255	10	860	0	-	-	-
0.049416	590	5168	0	-	-	-
0.0494051	4110	4141	2	0.0220556	9	0
0.0493792	10	565	0	-	-	-
0.0493621	5140	5216	1	0.0030303	63	6
0.049357	5020	5219	2	0.000687377	102	14
0.0492959	51	4110	0	-	-	-
0.049294	1200	5161	0	-	-	-
0.0492135	250	3440	0	-	-	-
0.0492103	5100	5217	1	0.00787402	67	1
0.0491639	830	4721	0	-	-	-
0.0491607	920	5012	0	-	-	-
0.0490599	3410	3430	6	1.24234e-08	706	389
0.0490307	4141	4650	0	-	-	-
0.0488791	590	5130	0	-	-	-
0.0487371	5161	5218	12	3.28918e-09	710	536
0.0487292	4115	5215	2	0.000499717	243	84
0.0487159	310	4722	0	-	-	-
0.0486465	601	4915	0	-	-	-
0.0486405	250	4910	0	-	-	-
0.0486122	100	330	0	-	-	-
0.048533	760	4960	0	-	-	-
0.0484749	4350	4977	0	-	-	-
0.0483822	10	4915	0	-	-	-
0.0483755	71	562	0	-	-	-
0.0483536	4914	5162	4	5.04752e-05	247	128
0.048244	3008	5014	0	-	-	-
0.0482215	4672	5211	0	-	-	-
0.0481015	5133	5200	9	6.9805e-05	162	58
0.0480978	3008	3430	0	-	-	-
0.0480777	920	4911	0	-	-	-
0.0480647	592	5160	0	-	-	-
0.0480415	590	4630	0	-	-	-
0.048032	3008	3460	0	-	-	-
0.0479889	5110	5131	0	-	-	-
0.0479391	52	860	0	-	-	-
0.0479269	4130	4960	0	-	-	-
0.0478955	512	4916	0	-	-	-
0.0478701	920	3015	0	-	-	-
0.0478545	601	4510	0	-	-	-
0.0478492	4664	5210	9	1.47909e-09	905	605
0.0478461	100	240	0	-	-	-
0.0478081	4668	5031	5	1.64253e-07	401	184
0.0477823	330	4668	0	-	-	-
0.0476716	480	5110	0	-	-	-
0.0476476	5214	5223	17	8.98892e-16	1071	1020
0.0476232	4540	5133	2	0.0108843	28	0
0.0475669	561	5211	0	-	-	-
0.0475621	4115	4727	0	-	-	-
0.0475168	4151	4350	5	5.32391e-05	149	45
0.0474723	51	500	3	0.00124667	49	2
0.0474707	5210	5218	9	2.45529e-12	964	670
0.0474531	860	5034	0	-	-	-
0.0473805	3420	4964	0	-	-	-
0.0473304	410	5140	0	-	-	-
0.0473268	10	5220	0	-	-	-
0.0473179	4070	4115	0	-	-	-
0.0472937	280	4912	0	-	-	-
0.0472935	410	5160	0	-	-	-
0.0472471	4978	5133	0	-	-	-
0.0472182	5160	5162	33	1.59088e-15	1135	1101
0.0471307	4110	5215	5	3.18581e-07	378	224
0.0470635	563	4620	0	-	-	-
0.0469787	280	4151	0	-	-	-
0.0469106	4350	5034	1	0.0274713	1	0
0.0468815	3440	4960	0	-	-	-
0.0468724	1230	5140	0	-	-	-
0.0468184	4140	5217	0	-	-	-
0.0468073	514	601	2	1.39604e-05	426	105
0.046799	510	5100	0	-	-	-
0.0467975	4510	4914	9	4.24197e-07	575	333
0.0467962	4140	5134	0	-	-	-
0.0467904	4110	4151	8	6.79348e-06	367	142
0.0467385	280	3430	0	-	-	-
0.0467237	562	830	0	-	-	-
0.0467167	310	3420	0	-	-	-
0.0466333	5212	5215	13	1.02091e-13	1052	870
0.0466047	4115	4662	0	-	-	-
0.0465994	4530	4960	1	0.0985357	0	0
0.0465955	3030	4720	0	-	-	-
0.0465773	4623	5211	0	-	-	-
0.04651	5210	5213	15	1.86402e-17	1097	991
0.0464169	5161	5320	12	0.000173379	66	7
0.0464144	531	5120	0	-	-	-
0.0463823	4713	5322	1	0.20941	0	0
0.0463115	3460	5168	0	-	-	-
0.0463063	3430	5133	0	-	-	-
0.0462941	250	260	0	-	-	-
0.046264	565	5110	0	-	-	-
0.0461528	340	590	0	-	-	-
0.046125	860	920	0	-	-	-
0.0460274	590	4380	0	-	-	-
0.0460114	4930	5162	3	2.13971e-05	355	110
0.0459657	4390	5222	2	0.00553709	18	1
0.0459374	3430	5131	0	-	-	-
0.0459284	5100	5110	0	-	-	-
0.0458989	564	4978	0	-	-	-
0.0458437	4912	5145	2	0.00115572	4	1
0.0457928	260	4730	0	-	-	-
0.0457874	3010	3050	0	-	-	-
0.0457715	190	4115	0	-	-	-
0.0457558	260	4916	0	-	-	-
0.0457446	591	5142	0	-	-	-
0.0457359	4115	5131	0	-	-	-
0.0457253	5145	5210	9	1.41006e-08	615	476
0.0456662	4330	5168	0	-	-	-
0.0456048	620	4115	0	-	-	-
0.0456046	3022	5131	0	-	-	-
0.0455958	512	3008	0	-	-	-
0.0455846	4977	5168	0	-	-	-
0.0455652	380	500	0	-	-	-
0.0455615	4978	5010	0	-	-	-
0.0455602	562	4210	1	0.00977199	31	1
0.0455568	30	4914	0	-	-	-
0.0455341	760	4270	0	-	-	-
0.0454954	3022	4390	0	-	-	-
0.0454462	1230	5210	0	-	-	-
0.0453921	500	3430	0	-	-	-
0.0453863	4146	5010	0	-	-	-
0.0453287	4066	5131	2	0.00180027	64	9
0.0453225	3020	5217	0	-	-	-
0.0452827	590	4141	0	-	-	-
0.0452746	3008	4150	0	-	-	-
0.0452547	4151	4310	3	0.00717395	19	1
0.0452545	71	100	0	-	-	-
0.0452386	3440	4141	0	-	-	-
0.0452244	5130	5131	7	7.76066e-06	349	110
0.0451989	983	5166	0	-	-	-
0.0451819	3440	5222	0	-	-	-
0.0451129	51	5217	0	-	-	-
0.045105	3060	5134	0	-	-	-
0.0450916	760	4915	0	-	-	-
0.0450822	240	4115	0	-	-	-
0.0450355	4721	5130	0	-	-	-
0.0450104	5133	5168	14	7.5669e-09	632	448
0.0449593	4115	4915	0	-	-	-
0.0449362	100	5152	1	0.00568182	154	1
0.0449078	565	4066	0	-	-	-
0.0448768	4915	5210	8	2.3994e-08	496	333
0.0448553	564	4260	0	-	-	-
0.0448367	260	330	3	5.20562e-05	225	31
0.0448312	280	5131	0	-	-	-
0.0447988	260	5014	0	-	-	-
0.0446872	512	4115	0	-	-	-
0.0446797	983	5132	0	-	-	-
0.0446476	600	601	0	-	-	-
0.0446001	514	5211	0	-	-	-
0.0445684	500	4140	0	-	-	-
0.0445592	3030	5120	0	-	-	-
0.044521	920	5134	0	-	-	-
0.0445114	531	4142	7	2.67129e-07	678	252
0.0445086	4621	5014	1	0.00558659	10	1
0.0444659	512	5162	0	-	-	-
0.0444596	410	5145	0	-	-	-
0.0444548	100	4960	0	-	-	-
0.0444359	330	4910	0	-	-	-
0.0443358	5161	5412	0	-	-	-
0.0443269	4070	5110	2	0.0112201	66	0
0.0443039	100	5014	0	-	-	-
0.0443003	4623	5322	0	-	-	-
0.0442609	531	4151	0	-	-	-
0.0442557	4978	5322	0	-	-	-
0.0442353	4115	4330	0	-	-	-
0.0441901	51	4350	0	-	-	-
0.0441374	500	4960	0	-	-	-
0.0441358	4914	5020	4	1.55369e-05	509	135
0.0441026	280	4115	0	-	-	-
0.0440463	500	590	0	-	-	-
0.0439852	100	4151	0	-	-	-
0.0439569	5215	5412	2	0.0025281	48	2
0.0439026	330	520	0	-	-	-
0.0438941	3015	4390	6	3.51244e-05	132	72
0.0438544	564	5221	0	-	-	-
0.0438501	3050	5016	0	-	-	-
0.0438443	4915	4964	0	-	-	-
0.0438319	565	5162	0	-	-	-
0.0438154	531	5412	0	-	-	-
0.0437837	592	4915	0	-	-	-
0.0437649	590	5164	0	-	-	-
0.0437619	4350	5120	0	-	-	-
0.0437588	4910	4915	16	1.05526e-09	730	612
0.043755	4151	4978	0	-	-	-
0.043744	40	500	8	2.17839e-06	357	111
0.0437287	4115	4916	0	-	-	-
0.0436593	920	5410	0	-	-	-
0.0436334	260	760	0	-	-	-
0.043626	5131	5222	3	1.81534e-05	362	142
0.0435867	3022	4915	0	-	-	-
0.0435733	600	5120	0	-	-	-
0.0435632	860	983	5	0.000142159	190	34
0.0435593	5212	5214	12	3.04606e-14	1035	839
0.0435321	4380	4910	8	1.45721e-06	325	134
0.0434887	514	531	0	-	-	-
0.04348	4662	5166	12	4.30952e-08	695	425
0.0434084	10	640	5	0.000317864	91	7
0.0433968	280	4666	0	-	-	-
0.0433784	4930	5140	2	0.00537634	72	6
0.0433599	5031	5160	0	-	-	-
0.0433312	100	5221	0	-	-	-
0.0433005	5130	5212	0	-	-	-
0.0432822	330	3060	0	-	-	-
0.0432728	3430	5162	0	-	-	-
0.0432605	10	512	0	-	-	-
0.0432572	5110	5212	0	-	-	-
0.0431772	350	860	0	-	-	-
0.0431721	380	531	0	-	-	-
0.0431572	3440	5164	0	-	-	-
0.0431459	10	5322	0	-	-	-
0.0431307	250	620	0	-	-	-
0.0431183	4622	5168	28	1.25782e-10	887	679
0.0431118	4115	5222	3	0.000247778	81	14
0.0430644	770	4915	0	-	-	-
0.0430579	500	5203	0	-	-	-
0.0430397	4910	5162	5	2.79869e-05	281	101
0.0430204	520	3430	0	-	-	-
0.0430183	51	4960	0	-	-	-
0.0429457	10	5130	0	-	-	-
0.0429443	100	5215	0	-	-	-
0.0428819	5014	5322	2	0.027256	2	0
0.042845	4151	5110	0	-	-	-
0.042829	330	4915	1	1	0	0
0.0428234	564	5412	0	-	-	-
0.0428081	601	5134	0	-	-	-
0.0427962	600	5211	0	-	-	-
0.0427504	3008	4115	0	-	-	-
0.042742	3440	4340	0	-	-	-
0.0427273	240	330	0	-	-	-
0.042682	531	3440	0	-	-	-
0.0426599	601	5152	0	-	-	-
0.042636	260	562	0	-	-	-
0.0426312	601	4330	0	-	-	-
0.0425874	10	51	8	1.8973e-08	481	132
0.0425827	4070	5161	4	7.16961e-05	129	48
0.0425798	3022	5222	0	-	-	-
0.0425779	5216	5217	2	0.000407947	164	12
0.0425666	4630	5166	13	2.51251e-07	526	257
0.0425654	240	4530	0	-	-	-
0.042555	830	3008	0	-	-	-
0.0425258	3440	4911	0	-	-	-
0.0425047	4664	4915	11	4.08629e-11	787	526
0.0424854	601	4960	0	-	-	-
0.0424684	4115	5164	1	0.0830586	0	0
0.0424082	4064	5210	0	-	-	-
0.0424053	10	4630	0	-	-	-
0.0423686	562	4660	1	0.0171426	44	0
0.0423642	561	3430	0	-	-	-
0.0423614	260	5217	0	-	-	-
0.0423517	280	4915	0	-	-	-
0.0423464	4130	5010	0	-	-	-
0.0423263	3030	5161	1	0.0322127	8	0
0.0423261	330	5412	0	-	-	-
0.0423155	562	4350	0	-	-	-
0.0422977	4010	4390	3	0.0140338	15	0
0.04228	4911	5164	0	-	-	-
0.0422656	100	4666	0	-	-	-
0.0422587	531	4510	0	-	-	-
0.0422565	5020	5323	1	0.00636943	15	2
0.042229	860	5020	0	-	-	-
0.042177	410	5212	0	-	-	-
0.0421766	562	650	0	-	-	-
0.0421601	534	4916	0	-	-	-
0.0421285	5152	5162	28	7.23578e-09	674	413
0.0420863	4915	5110	2	0.000102877	356	74
0.0420628	30	100	0	-	-	-
0.0420269	4621	4915	1	0.0154321	20	0
0.0420146	51	4916	0	-	-	-
0.0419183	563	3008	0	-	-	-
0.0419168	280	4962	0	-	-	-
0.0419059	510	562	0	-	-	-
0.0418911	830	4723	0	-	-	-
0.0418748	350	4066	0	-	-	-
0.0418686	4660	5133	6	8.23314e-06	124	43
0.0418613	190	4330	0	-	-	-
0.0418244	250	4915	0	-	-	-
0.0418205	250	5211	0	-	-	-
0.041809	512	562	0	-	-	-
0.0417992	500	5034	0	-	-	-
0.0417747	562	5222	1	0.0158309	41	0
0.041723	3020	5212	0	-	-	-
0.0417175	250	4151	0	-	-	-
0.0416849	4141	5010	3	0.000898455	77	20
0.0416621	920	4540	0	-	-	-
0.0416134	240	350	0	-	-	-
0.0416081	3440	4114	0	-	-	-
0.0415966	5034	5200	10	0.000117901	84	17
0.0415688	620	5134	0	-	-	-
0.0415659	4916	5014	0	-	-	-
0.0415294	4115	4145	0	-	-	-
0.0415165	4915	5322	0	-	-	-
0.0414972	534	5034	0	-	-	-
0.0414022	590	5162	0	-	-	-
0.0413877	30	5010	0	-	-	-
0.0413558	5204	5220	0	-	-	-
0.041334	3008	4141	0	-	-	-
0.0412939	562	3060	0	-	-	-
0.041274	4340	4370	0	-	-	-
0.0412666	10	983	0	-	-	-
0.041266	4920	5322	1	0.0939307	0	0
0.0412622	5014	5132	0	-	-	-
0.0412148	510	4612	0	-	-	-
0.0411701	310	514	3	0.000472	152	19
0.0411495	5204	5216	0	-	-	-
0.0411279	3008	5010	0	-	-	-
0.0411143	4650	5211	12	9.67506e-11	860	627
0.0411014	4916	5221	7	8.32957e-05	117	50
0.0410952	760	4350	0	-	-	-
0.0410917	500	4978	0	-	-	-
0.0410858	4380	4630	12	1.29674e-10	843	706
0.0410748	4114	4350	5	8.92734e-09	198	93
0.0410533	3008	4974	0	-	-	-
0.0410497	100	4662	0	-	-	-
0.0410334	100	5168	0	-	-	-
0.0410192	330	4916	0	-	-	-
0.0410071	5212	5221	11	7.13921e-16	1046	831
0.0409691	10	40	1	0.00573066	49	2
0.0409629	590	4916	0	-	-	-
0.0409615	3015	4960	0	-	-	-
0.0409562	5110	5322	0	-	-	-
0.0409252	4520	4915	1	0.0270991	10	0
0.0408879	830	5130	0	-	-	-
0.0408726	3020	4915	0	-	-	-
0.0408679	600	5414	0	-	-	-
0.0408607	563	4916	0	-	-	-
0.0408388	591	5210	0	-	-	-
0.0408277	340	4913	0	-	-	-
0.040772	260	4110	0	-	-	-
0.0407716	590	4540	0	-	-	-
0.0407544	4141	5014	0	-	-	-
0.0407542	10	5219	0	-	-	-
0.0407351	561	590	0	-	-	-
0.0407074	4270	5211	5	1.27107e-05	325	188
0.0407049	512	4390	0	-	-	-
0.0406821	3013	4520	0	-	-	-
0.0406679	4915	5215	14	4.1486e-09	858	677
0.0406622	531	4730	0	-	-	-
0.0406618	983	3430	0	-	-	-
0.0406505	563	5010	0	-	-	-
0.0406503	510	830	0	-	-	-
0.0406503	1200	5216	0	-	-	-
0.040637	40	830	4	0.000523615	142	51
0.0406269	4530	5166	7	9.31358e-05	211	72
0.0406075	512	5169	0	-	-	-
0.0405581	190	280	0	-	-	-
0.0405321	3030	5010	0	-	-	-
0.0405166	4666	5161	8	1.13785e-06	341	198
0.0405161	30	240	0	-	-	-
0.0404965	3420	4110	4	0.000212684	64	25
0.0404751	5162	5217	1	0.0222525	6	0
0.0404516	920	5222	0	-	-	-
0.0404496	190	3050	0	-	-	-
0.0404338	860	4912	0	-	-	-
0.0404263	4915	5020	5	3.50317e-06	594	199
0.0404168	591	1200	0	-	-	-
0.0404057	531	600	1	0.00287356	61	6
0.0403997	4370	5168	0	-	-	-
0.040397	592	5020	0	-	-	-
0.0403893	760	4962	0	-	-	-
0.0403826	4114	4930	2	0.000718808	81	6
0.0403703	5164	5221	8	2.43317e-07	425	287
0.0403562	534	5166	0	-	-	-
0.0403258	3410	5168	0	-	-	-
0.0403254	4723	5215	1	0.0153374	30	0
0.0403171	5161	5212	15	1.63174e-10	884	742
0.0403161	5130	5322	0	-	-	-
0.040313	4666	5203	5	0.000735765	112	26
0.0402931	4350	5152	5	9.91977e-05	68	20
0.0402916	5166	5200	45	1.21419e-10	1081	959
0.0402607	330	5222	1	0.0183486	2	0
0.0402422	40	250	0	-	-	-
0.0402408	5014	5221	0	-	-	-
0.0402296	592	5216	0	-	-	-
0.0402161	562	564	1	0.0985116	0	0
0.0401815	3030	4962	0	-	-	-
0.0401684	830	920	0	-	-	-
0.0401683	531	564	0	-	-	-
0.0401467	564	4721	0	-	-	-
0.0401386	564	4911	0	-	-	-
0.0401304	3015	4720	2	0.00768092	52	3
0.0401207	4140	4210	0	-	-	-
0.0401147	10	5140	0	-	-	-
0.0401142	4910	4960	6	5.78843e-07	471	209
0.0401086	4115	5221	0	-	-	-
0.0400779	52	4915	0	-	-	-
0.0400699	5200	5322	0	-	-	-
0.0400534	760	5221	0	-	-	-
0.0400502	4510	4530	14	4.24961e-07	415	192
0.0400411	410	5218	0	-	-	-
0.0400218	500	5222	0	-	-	-
0.039963	4390	5410	1	0.0160643	26	0
0.0399501	4662	5211	10	1.16515e-08	644	424
0.0399467	260	4930	0	-	-	-
0.0399398	40	920	0	-	-	-
0.0398959	380	5221	0	-	-	-
0.0398953	4910	5222	4	3.7824e-05	258	102
0.0398924	4070	5031	3	0.0100125	25	0
0.0398863	4720	4722	14	6.98083e-11	757	558
0.039876	240	770	3	0.000643489	69	4
0.0398691	3030	5131	0	-	-	-
0.03986	280	5134	0	-	-	-
0.0398465	190	860	1	0.00318471	125	12
0.03982	590	3015	0	-	-	-
0.0398157	561	5215	0	-	-	-
0.0398041	4721	5215	0	-	-	-
0.0398014	3440	5217	0	-	-	-
0.0397955	330	3030	0	-	-	-
0.0397774	310	3040	0	-	-	-
0.0397738	4340	4720	2	4.94022e-05	520	102
0.0397606	590	5414	0	-	-	-
0.0397354	600	5032	0	-	-	-
0.0396915	5034	5168	2	0.117182	0	0
0.0396702	562	4668	1	0.0251959	23	0
0.03967	5014	5166	3	0.00224277	19	1
0.0396653	51	4270	0	-	-	-
0.0396502	4140	5221	0	-	-	-
0.0396458	5034	5162	0	-	-	-
0.0396302	4660	4721	0	-	-	-
0.0396203	4115	4666	0	-	-	-
0.0396195	3015	5034	2	0.0447284	2	0
0.0396015	3440	4510	0	-	-	-
0.0395721	190	5034	0	-	-	-
0.0395662	562	1100	22	2.41573e-08	866	584
0.0395387	280	4140	0	-	-	-
0.0395286	190	5110	13	1.65923e-09	688	402
0.0395137	100	4270	0	-	-	-
0.0394978	3440	4530	0	-	-	-
0.0394656	1230	5160	0	-	-	-
0.0394582	600	5010	0	-	-	-
0.0394526	5217	5322	0	-	-	-
0.0394396	920	4010	0	-	-	-
0.0394321	4664	5211	10	2.7576e-10	736	425
0.039431	5034	5211	8	5.30917e-07	380	204
0.0394111	592	5213	0	-	-	-
0.0394071	250	5110	0	-	-	-
0.0393871	4962	5217	0	-	-	-
0.0393588	562	4916	1	0.0212766	36	0
0.039342	5134	5221	1	0.0057971	79	2
0.0393339	3030	4340	0	-	-	-
0.0392912	5161	5216	5	1.70843e-05	306	93
0.039288	562	3430	0	-	-	-
0.0392809	310	3022	0	-	-	-
0.0392294	30	565	0	-	-	-
0.0392154	5016	5166	5	0.00824429	9	1
0.0392145	564	5133	0	-	-	-
0.0392093	860	4660	0	-	-	-
0.0391789	4141	5222	1	0.0534028	0	0
0.0391679	4810	5166	10	0.000111438	185	62
0.0391493	830	4916	0	-	-	-
0.0391421	4621	4722	5	9.87796e-05	245	116
0.0391418	4110	4727	0	-	-	-
0.0391216	4060	5166	12	0.00028694	183	52
0.0391096	3410	3420	9	3.48831e-11	862	582
0.0390906	860	3030	0	-	-	-
0.0390834	4964	5322	0	-	-	-
0.0390814	830	4664	0	-	-	-
0.0390433	190	3430	0	-	-	-
0.0390038	350	5131	0	-	-	-
0.0389971	10	4540	0	-	-	-
0.0389963	531	4070	0	-	-	-
0.0389909	5169	5221	9	1.14303e-07	605	423
0.0389368	534	600	0	-	-	-
0.0388925	100	3015	0	-	-	-
0.0388599	3008	5412	0	-	-	-
0.0388546	561	5110	0	-	-	-
0.03884	240	4960	0	-	-	-
0.0388395	3008	4623	0	-	-	-
0.0388197	240	4964	0	-	-	-
0.0388019	190	4145	13	1.65923e-09	516	310
0.038801	4915	5212	7	1.56389e-08	531	313
0.0388	4520	4622	0	-	-	-
0.03879	240	280	0	-	-	-
0.0387559	3320	4722	0	-	-	-
0.0387337	4115	5416	3	0.000424628	184	26
0.0386639	4520	5143	0	-	-	-
0.0386433	3420	5340	0	-	-	-
0.0386377	4510	5164	9	1.35292e-06	284	120
0.0386207	3015	5215	0	-	-	-
0.0386193	1230	5132	0	-	-	-
0.0386013	982	5164	0	-	-	-
0.0385903	4110	4380	0	-	-	-
0.0385578	500	5133	0	-	-	-
0.0385531	5166	5168	16	5.02073e-05	208	66
0.0385505	30	5131	0	-	-	-
0.0385418	3015	4270	2	0.0139815	9	0
0.0385285	3022	4810	0	-	-	-
0.0385252	4270	4340	2	0.00029359	219	63
0.0385171	71	534	0	-	-	-
0.0385152	4140	4962	0	-	-	-
0.0384969	1230	5220	0	-	-	-
0.0384905	590	4964	0	-	-	-
0.038488	4350	4360	2	0.00106458	11	3
0.0384852	240	970	0	-	-	-
0.0384764	5217	5320	0	-	-	-
0.0384648	4020	4151	4	0.0493614	1	0
0.0384496	600	4350	0	-	-	-
0.0384491	30	4141	0	-	-	-
0.0384149	250	5134	0	-	-	-
0.0384009	3022	5162	0	-	-	-
0.0383807	310	5110	0	-	-	-
0.0383771	4140	5162	13	0.000173379	60	9
0.0383654	4666	5110	2	0.0103093	59	0
0.0383223	534	3440	0	-	-	-
0.0382805	5031	5200	3	0.0573248	0	0
0.0382794	3008	3013	15	2.42525e-10	568	359
0.0382417	4350	5031	0	-	-	-
0.0382338	4650	4960	5	3.88819e-06	511	160
0.0382213	4064	5223	1	0.00879765	57	1
0.0382135	3440	4540	0	-	-	-
0.0381956	3015	5410	0	-	-	-
0.0381935	514	564	0	-	-	-
0.0381908	830	4914	0	-	-	-
0.0381899	240	3010	0	-	-	-
0.0381775	860	4910	0	-	-	-
0.0381723	4915	5213	10	1.80438e-08	689	423
0.0381695	4060	5322	4	0.105689	0	0
0.0381335	10	4270	0	-	-	-
0.0381145	562	5110	1	0.00835655	71	1
0.038039	561	5131	0	-	-	-
0.0380346	562	5205	2	0.000987605	60	11
0.0380341	190	5131	0	-	-	-
0.0380099	51	5200	0	-	-	-
0.0379979	51	4380	0	-	-	-
0.0379607	4912	5219	6	6.08453e-07	276	61
0.037946	71	5212	0	-	-	-
0.0379377	260	310	1	0.0271071	13	0
0.0379219	4370	5131	1	0.00617284	50	1
0.0379163	3420	5120	0	-	-	-
0.0379143	4150	5222	4	7.28974e-06	372	224
0.0379101	4540	4915	13	1.13031e-12	892	658
0.0379002	4070	5010	3	0.00104591	63	7
0.0378928	30	590	0	-	-	-
0.0378907	760	4623	0	-	-	-
0.0378885	4070	5132	0	-	-	-
0.0378455	760	4620	0	-	-	-
0.0378097	3440	4978	0	-	-	-
0.0377944	830	4660	0	-	-	-
0.0377938	4660	4910	13	7.27453e-08	519	400
0.0377527	920	4130	0	-	-	-
0.0377352	10	4978	0	-	-	-
0.0377338	4260	4666	0	-	-	-
0.0377226	830	4621	0	-	-	-
0.0377038	4622	5202	1	0.0507514	0	0
0.0376662	330	531	0	-	-	-
0.0376389	4920	5410	4	1.18454e-06	485	136
0.0376245	4370	4390	0	-	-	-
0.0376056	330	5215	0	-	-	-
0.0375819	4710	5100	0	-	-	-
0.0375797	4722	4730	6	6.04916e-06	327	166
0.0375666	830	4060	0	-	-	-
0.0374916	5162	5322	1	0.176457	0	0
0.0374913	600	4660	0	-	-	-
0.037458	250	970	0	-	-	-
0.0374442	601	5217	0	-	-	-
0.0373947	4110	4666	0	-	-	-
0.0373851	4151	4380	13	1.83763e-09	495	248
0.0373839	531	4115	0	-	-	-
0.0372915	4310	5222	1	0.0160428	3	0
0.0372835	340	5120	0	-	-	-
0.0372228	250	601	0	-	-	-
0.0372173	3030	4666	0	-	-	-
0.0372157	4623	5162	23	5.18036e-11	872	731
0.0371981	3460	4340	0	-	-	-
0.0371967	4390	5322	0	-	-	-
0.0371909	640	1200	5	1.56923e-05	297	62
0.0371856	250	4140	0	-	-	-
0.0371717	30	51	5	5.55001e-07	505	187
0.0371541	4612	4960	0	-	-	-
0.0371229	531	4972	0	-	-	-
0.0371079	3430	4960	0	-	-	-
0.0370973	3030	4110	4	0.000231592	123	46
0.0370714	280	5222	0	-	-	-
0.0370666	564	4722	0	-	-	-
0.0370649	601	4810	0	-	-	-
0.0370641	3420	5410	0	-	-	-
0.0370636	591	5213	0	-	-	-
0.0370512	3420	4146	0	-	-	-
0.037048	4380	4520	2	0.00412141	9	4
0.0370441	562	3030	0	-	-	-
0.0370327	4390	5168	2	0.0869147	0	0
0.0370042	601	4210	0	-	-	-
0.0369954	640	4664	0	-	-	-
0.0369873	3013	4350	0	-	-	-
0.0369688	4066	4666	9	6.26514e-08	583	462
0.0369529	4730	4915	7	2.9999e-06	341	135
0.0369466	10	4260	0	-	-	-
0.0369348	4910	5134	0	-	-	-
0.0369209	4910	5322	0	-	-	-
0.03692	531	4720	0	-	-	-
0.0369153	1100	5169	14	0.0651316	0	0
0.0368949	4530	5322	2	0.0238716	11	0
0.0368881	600	5212	0	-	-	-
0.036881	410	5223	0	-	-	-
0.0368795	330	4650	0	-	-	-
0.0368335	4140	4620	12	5.95558e-05	85	9
0.0367785	3015	4146	0	-	-	-
0.0367696	4910	5221	14	4.40699e-13	926	814
0.0367649	860	5166	0	-	-	-
0.0367492	5219	5223	11	4.28551e-10	918	692
0.0367394	830	5322	0	-	-	-
0.0367095	534	4540	0	-	-	-
0.0367025	280	4964	0	-	-	-
0.0366949	4120	5200	8	0.00139898	49	9
0.0366928	5322	5340	1	0.018018	4	0
0.0366769	4664	4930	8	5.9091e-09	789	444
0.0366763	260	520	0	-	-	-
0.0366429	5169	5211	4	2.90102e-05	266	128
0.0366414	4666	5322	2	0.0497575	1	0
0.0366365	4151	5168	19	0.00141655	81	11
0.0366278	5221	5222	7	5.14261e-08	757	543
0.0366196	4010	4520	4	0.000266582	292	78
0.036618	330	4666	0	-	-	-
0.0366178	4623	4720	0	-	-	-
0.0366173	4710	5166	0	-	-	-
0.0366139	4668	5166	16	2.87606e-08	840	541
0.0365838	5211	5221	12	2.25068e-12	979	739
0.0365643	4114	4115	3	0.000139301	148	26
0.0365552	983	4370	0	-	-	-
0.0365519	830	4330	0	-	-	-
0.0365473	280	3410	0	-	-	-
0.036545	4510	4915	11	6.27853e-07	419	235
0.0365351	4110	4630	2	0.000691192	69	15
0.0365249	260	5212	0	-	-	-
0.0365026	240	4540	0	-	-	-
0.036502	562	4340	0	-	-	-
0.0364964	350	565	0	-	-	-
0.0364931	51	5215	0	-	-	-
0.0364929	3008	5152	0	-	-	-
0.0364594	510	5203	0	-	-	-
0.0364486	4141	4930	1	0.0214477	6	0
0.0364405	340	920	0	-	-	-
0.0364243	860	5130	0	-	-	-
0.0364139	830	5110	0	-	-	-
0.0364122	120	5014	0	-	-	-
0.0363824	3440	5133	0	-	-	-
0.0363666	4066	5166	8	5.77779e-06	379	136
0.0363359	3430	5414	0	-	-	-
0.0363355	640	5223	0	-	-	-
0.0363167	240	480	0	-	-	-
0.0362973	4012	4915	12	2.3994e-08	646	439
0.0362589	51	562	0	-	-	-
0.0362515	100	4650	0	-	-	-
0.0362137	250	5200	0	-	-	-
0.0362098	380	5217	0	-	-	-
0.0362028	563	5222	0	-	-	-
0.0362018	30	5161	0	-	-	-
0.036192	564	5203	0	-	-	-
0.0361856	500	4010	0	-	-	-
0.0361573	240	601	0	-	-	-
0.0361442	310	330	2	0.00187221	33	3
0.0361408	100	770	0	-	-	-
0.0361281	830	4370	0	-	-	-
0.0361248	5166	5222	11	5.44697e-07	616	338
0.0361148	4930	5214	4	5.18718e-07	589	285
0.0361133	240	3022	0	-	-	-
0.0361094	531	4666	0	-	-	-
0.0360722	4978	5222	0	-	-	-
0.0360365	4664	5217	0	-	-	-
0.0360263	4540	5143	2	0.00294985	324	43
0.0360223	100	520	0	-	-	-
0.0360207	5034	5130	0	-	-	-
0.0360081	30	250	0	-	-	-
0.0360025	4520	4930	1	0.012012	54	0
0.0359896	563	4650	0	-	-	-
0.0359879	760	5014	0	-	-	-
0.0359872	4110	5034	2	0.0915093	0	0
0.0359818	71	250	0	-	-	-
0.0359777	5143	5166	3	0.00361958	7	3
0.0359772	4978	5200	0	-	-	-
0.0359675	860	3050	0	-	-	-
0.0359439	564	5217	0	-	-	-
0.0359403	590	4664	2	0.00621118	130	4
0.0359391	4066	4070	5	6.54155e-05	259	156
0.0358984	640	5215	0	-	-	-
0.0358958	4930	5215	5	5.50284e-07	568	200
0.0358897	4151	4622	15	0.000318278	72	10
0.0358883	240	5133	0	-	-	-
0.0358793	3440	4662	0	-	-	-
0.035879	830	5222	0	-	-	-
0.035849	510	3060	0	-	-	-
0.0358156	4340	4350	1	0.00759494	132	2
0.0358153	4723	4916	9	2.16453e-09	848	564
0.0357784	830	4960	0	-	-	-
0.03577	500	4914	0	-	-	-
0.035769	4115	5020	0	-	-	-
0.0357525	4390	5034	2	0.0851799	0	0
0.0357401	4912	5223	6	2.43381e-07	236	64
0.0357384	4260	4914	0	-	-	-
0.0357227	4114	4966	0	-	-	-
0.0357077	4010	4151	29	1.00208e-06	392	170
0.0357035	4916	5416	0	-	-	-
0.0356817	3420	5211	1	0.0124416	7	0
0.0356705	562	4144	1	0.0248756	9	0
0.0356619	4622	4960	0	-	-	-
0.0356539	4010	5221	11	5.53949e-09	627	382
0.0356181	3440	5200	0	-	-	-
0.0356144	3008	4510	0	-	-	-
0.0356067	1100	5200	3	0.86894	0	0
0.0356029	3420	5132	0	-	-	-
0.0355962	20	5213	0	-	-	-
0.0355755	3013	3460	0	-	-	-
0.0355741	4115	4540	0	-	-	-
0.0355719	4962	5031	5	1.79306e-08	815	406
0.035564	330	4913	0	-	-	-
0.0355478	562	5221	1	0.0119581	63	0
0.0355385	3430	4623	0	-	-	-
0.035534	512	4142	0	-	-	-
0.0355259	4612	4650	13	0.000184213	55	12
0.0355187	4710	4960	0	-	-	-
0.0354946	3460	5130	0	-	-	-
0.0354826	3030	4930	0	-	-	-
0.0354741	564	4620	0	-	-	-
0.0354603	240	4660	0	-	-	-
0.0354455	250	830	0	-	-	-
0.035443	590	4064	1	0.0283172	1	0
0.0354371	4110	5203	13	3.42825e-06	593	342
0.035432	10	4960	0	-	-	-
0.0354315	100	5410	0	-	-	-
0.0354212	512	600	0	-	-	-
0.0354168	3010	3022	0	-	-	-
0.0354059	4350	4910	2	0.0014823	45	12
0.0353979	4916	5131	1	0.0143678	22	0
0.0353517	531	3430	0	-	-	-
0.035343	1230	5212	0	-	-	-
0.0353372	4151	5203	19	2.92581e-06	530	301
0.0353214	3040	4146	0	-	-	-
0.0353037	380	3030	0	-	-	-
0.0353017	40	3030	0	-	-	-
0.0352973	10	4713	0	-	-	-
0.0352928	250	5322	0	-	-	-
0.0352904	4310	5132	1	0.0230263	2	0
0.0352888	310	3430	0	-	-	-
0.0352805	4612	5222	0	-	-	-
0.0352643	5140	5214	1	0.00808625	52	3
0.0352482	860	4140	0	-	-	-
0.0352366	4973	5322	0	-	-	-
0.0352271	5132	5211	1	0.0164381	27	0
0.0352158	4380	5152	16	2.54116e-07	386	205
0.0352088	4540	4977	0	-	-	-
0.0352025	380	5110	0	-	-	-
0.0351784	4964	5110	0	-	-	-
0.035178	3010	4066	0	-	-	-
0.0351523	600	5164	0	-	-	-
0.0351495	920	5203	0	-	-	-
0.0351456	591	5145	0	-	-	-
0.035136	510	5322	0	-	-	-
0.0351336	10	4614	0	-	-	-
0.0351216	3430	4914	0	-	-	-
0.0351181	52	5131	0	-	-	-
0.0351048	4666	4668	6	3.85895e-07	324	208
0.0351034	565	4110	0	-	-	-
0.0350944	4510	5340	0	-	-	-
0.0350549	4915	5218	9	6.90428e-09	631	401
0.0350472	564	5010	0	-	-	-
0.0350429	190	5322	0	-	-	-
0.0350291	4912	5212	4	0.000245654	61	11
0.035	3030	5203	0	-	-	-
0.0349733	4144	5110	0	-	-	-
0.0349679	3030	4668	0	-	-	-
0.0349629	250	4710	0	-	-	-
0.0349592	564	3430	0	-	-	-
0.0349431	970	4151	0	-	-	-
0.034942	3410	4110	1	0.0323604	8	0
0.0349418	5143	5211	0	-	-	-
0.0349324	4622	4668	9	3.35038e-07	538	399
0.0349315	260	5130	0	-	-	-
0.0349274	860	4070	0	-	-	-
0.0349217	564	590	11	1.55799e-07	570	363
0.0349185	330	920	0	-	-	-
0.0349082	500	4141	0	-	-	-
0.0348883	4666	5222	4	1.45449e-05	304	172
0.0348778	4010	4360	6	0.00116566	96	12
0.0348704	970	4146	0	-	-	-
0.0348594	512	563	0	-	-	-
0.0348532	590	5143	0	-	-	-
0.0348523	71	4722	0	-	-	-
0.03483	512	4914	0	-	-	-
0.0348291	5161	5203	26	5.8776e-12	1063	912
0.0348234	562	5412	0	-	-	-
0.034814	4960	5130	0	-	-	-
0.0348076	4912	4930	3	5.56009e-05	296	27
0.0348002	562	4530	0	-	-	-
0.0347729	4666	4722	9	1.08233e-07	533	352
0.0347652	510	4660	0	-	-	-
0.0347573	592	1200	0	-	-	-
0.0347529	5031	5169	3	2.27459e-05	214	61
0.0347507	564	4916	0	-	-	-
0.0347418	4914	5221	10	4.44123e-11	872	660
0.0347332	120	5221	0	-	-	-
0.0347208	10	5110	0	-	-	-
0.0347196	600	4142	4	4.21993e-05	143	48
0.0347179	4722	5134	2	0.000336319	86	30
0.0347119	830	4713	0	-	-	-
0.0346917	5020	5221	2	0.00225728	62	6
0.0346884	230	3008	0	-	-	-
0.0346681	4115	5161	6	4.98396e-06	320	161
0.0346649	4960	5162	3	8.415e-05	315	112
0.0346542	5132	5200	6	0.00149675	59	13
0.0346529	500	5221	0	-	-	-
0.0346523	4150	5322	1	0.0539511	0	0
0.0346502	4510	5032	1	0.0812153	0	0
0.0346189	514	4911	0	-	-	-
0.0345976	280	510	0	-	-	-
0.034597	512	5412	0	-	-	-
0.0345938	4612	5164	9	2.2821e-06	384	248
0.0345626	4720	4930	1	0.003003	62	3
0.0345541	601	5212	0	-	-	-
0.0345437	770	4070	0	-	-	-
0.0345275	3430	4064	0	-	-	-
0.0345231	4115	4975	0	-	-	-
0.0345115	4070	5222	3	1.45449e-05	167	77
0.0345106	3008	4142	0	-	-	-
0.0344696	4930	5142	6	8.03621e-07	543	189
0.0344688	562	5203	1	0.0687291	0	0
0.0344656	590	600	0	-	-	-
0.034464	330	5211	0	-	-	-
0.034411	563	3015	0	-	-	-
0.0343823	4662	4910	12	2.29895e-10	572	447
0.034374	260	620	1	0.00524934	42	2
0.0343673	4720	5322	1	0.177591	0	0
0.0343539	3030	4151	0	-	-	-
0.034348	230	5164	0	-	-	-
0.0343325	4912	5320	1	0.00558659	258	18
0.0343297	350	5110	0	-	-	-
0.0343146	4340	4721	0	-	-	-
0.0342872	563	4150	0	-	-	-
0.0342848	4914	5012	0	-	-	-
0.0342808	3420	4920	0	-	-	-
0.034279	3008	5169	4	0.00664135	19	1
0.0342662	250	561	0	-	-	-
0.0342627	600	4621	0	-	-	-
0.0342584	350	4370	0	-	-	-
0.0342473	4010	5200	37	6.48842e-12	893	639
0.0342445	5031	5162	0	-	-	-
0.0342397	590	5031	0	-	-	-
0.0342225	5166	5416	6	0.000122595	63	12
0.0342204	564	4977	0	-	-	-
0.0342166	3440	4730	0	-	-	-
0.0342097	3050	5131	0	-	-	-
0.0341788	5168	5200	14	3.28786e-06	265	92
0.0341457	860	5414	0	-	-	-
0.0341367	3060	4916	0	-	-	-
0.0341286	340	5034	1	0.0257009	21	0
0.0341126	280	512	0	-	-	-
0.0341045	4130	4910	0	-	-	-
0.0341033	3430	4962	0	-	-	-
0.0340984	5120	5166	5	5.20483e-05	377	137
0.0340972	4020	5221	0	-	-	-
0.0340907	564	5212	0	-	-	-
0.0340685	4140	4914	1	0.0135747	30	0
0.0340439	562	5130	0	-	-	-
0.0340389	4620	5034	2	0.0155978	2	0
0.0340317	640	5322	0	-	-	-
0.034027	280	565	0	-	-	-
0.034019	4130	5169	0	-	-	-
0.0340156	4915	5340	0	-	-	-
0.0339975	5031	5120	0	-	-	-
0.0339942	983	4930	0	-	-	-
0.0339638	830	5169	0	-	-	-
0.0339591	3430	4120	0	-	-	-
0.0339581	4510	5217	2	0.00294835	37	9
0.0339564	4064	5320	1	0.015748	9	0
0.0339532	4142	4150	0	-	-	-
0.0339406	4510	4720	10	6.67139e-07	377	230
0.0339305	860	3440	0	-	-	-
0.0338691	5133	5164	13	6.19574e-08	515	380
0.033863	250	4722	0	-	-	-
0.0338568	4621	5134	8	1.97691e-07	480	155
0.0338566	250	565	0	-	-	-
0.0338336	4141	4960	0	-	-	-
0.0338227	4120	5110	0	-	-	-
0.0338208	4110	4330	2	0.0248824	4	0
0.0338189	760	5212	0	-	-	-
0.0337867	830	4913	1	0.00297619	569	63
0.033783	5131	5134	2	5.45991e-05	317	56
0.03378	5152	5221	4	0.000513258	130	69
0.0337678	4114	5168	3	0.00162762	34	6
0.0337537	4622	4978	0	-	-	-
0.033736	4060	5203	5	0.0627548	0	0
0.0337216	4914	5215	10	1.65796e-11	845	661
0.0337151	4142	4660	0	-	-	-
0.0337096	4140	4930	1	0.00342466	37	13
0.0337039	51	564	0	-	-	-
0.0337014	510	5164	0	-	-	-
0.0336943	561	4977	1	0.0179637	1	0
0.033688	4914	5166	16	2.36026e-11	940	787
0.0336877	4370	5031	2	0.00955414	10	1
0.0336816	5168	5322	8	0.000189009	136	32
0.0336667	4912	4914	9	3.20053e-08	658	450
0.0336534	4720	5221	7	5.29871e-08	724	367
0.0336519	500	3060	0	-	-	-
0.0336363	240	565	0	-	-	-
0.0336336	600	4920	0	-	-	-
0.0336283	5014	5215	0	-	-	-
0.0336211	71	531	0	-	-	-
0.0336207	10	330	2	0.00187221	41	1
0.0336088	10	5203	1	0.0401146	3	0
0.0335968	514	4722	0	-	-	-
0.0335965	5215	5216	7	2.98724e-08	751	311
0.0335813	510	4530	0	-	-	-
0.0335701	5211	5322	0	-	-	-
0.0335484	4130	4142	0	-	-	-
0.0335483	770	4520	0	-	-	-
0.0335347	4520	5031	0	-	-	-
0.033528	860	5212	0	-	-	-
0.0335272	531	920	0	-	-	-
0.0335237	4145	4540	11	9.57827e-08	305	196
0.0335207	920	983	0	-	-	-
0.0335179	20	5020	0	-	-	-
0.0335176	4142	5169	0	-	-	-
0.0335159	4650	4916	6	9.92463e-05	72	34
0.0335148	5012	5132	0	-	-	-
0.0335087	601	4370	0	-	-	-
0.0335043	510	4962	0	-	-	-
0.0335013	10	1230	9	2.45324e-09	734	436
0.0335002	1200	5218	0	-	-	-
0.0334937	4151	5132	5	0.00182084	75	16
0.0334916	3022	4310	0	-	-	-
0.0334747	5220	5323	1	0.00574713	175	5
0.0334706	650	4210	0	-	-	-
0.0334683	5031	5130	0	-	-	-
0.033465	5031	5221	0	-	-	-
0.0334585	4350	4620	2	0.0366382	3	0
0.0334453	4340	5205	14	4.4527e-08	654	481
0.0334405	4912	5161	9	1.13458e-05	396	246
0.0334189	564	4910	0	-	-	-
0.0334174	5211	5412	0	-	-	-
0.0334155	760	5143	0	-	-	-
0.0334119	534	5212	0	-	-	-
0.033397	4380	5161	17	1.29674e-10	822	638
0.0333947	3420	4145	0	-	-	-
0.0333944	4270	5162	0	-	-	-
0.0333869	512	5322	0	-	-	-
0.0333826	760	3022	0	-	-	-
0.0333795	3018	4620	0	-	-	-
0.0333782	4142	5010	0	-	-	-
0.0333748	561	4260	0	-	-	-
0.033359	71	770	0	-	-	-
0.0333574	510	4350	0	-	-	-
0.0333501	534	5100	0	-	-	-
0.0333497	3040	5322	1	0.0482233	1	0
0.033347	600	4974	0	-	-	-
0.0333448	52	5132	0	-	-	-
0.0333422	5020	5223	2	0.000687377	93	11
0.0333261	10	620	11	7.23559e-10	665	243
0.0333228	4340	4540	2	0.000101112	440	88
0.0333069	590	4966	0	-	-	-
0.0333069	531	4978	0	-	-	-
0.0332894	4064	5414	1	0.038458	1	0
0.0332602	100	860	0	-	-	-
0.0332541	600	5412	0	-	-	-
0.0332384	4260	4668	0	-	-	-
0.0332343	565	4510	0	-	-	-
0.0332157	600	4915	0	-	-	-
0.0332115	590	3420	0	-	-	-
0.0332066	4973	5221	4	1.47342e-07	720	333
0.033204	563	5416	0	-	-	-
0.0331935	4621	4978	0	-	-	-
0.0331925	3410	4146	0	-	-	-
0.0331922	3440	5031	0	-	-	-
0.0331879	4141	4612	5	3.73406e-06	439	314
0.0331865	4972	5211	2	0.00109633	21	4
0.0331741	3430	5152	0	-	-	-
0.0331733	5168	5340	1	0.0243902	77	0
0.0331272	4010	4630	3	0.00536729	32	3
0.0331209	4910	4978	0	-	-	-
0.033077	620	5161	0	-	-	-
0.0330756	240	4520	0	-	-	-
0.0330536	860	3010	0	-	-	-
0.0330515	4370	5100	4	1.20589e-06	502	144
0.0330435	4120	4210	3	0.000303047	54	14
0.0330434	3430	5200	2	0.00511483	25	2
0.0330339	531	5211	0	-	-	-
0.0330089	760	4380	0	-	-	-
0.0330048	100	5034	0	-	-	-
0.0330031	500	5200	0	-	-	-
0.033001	983	5164	0	-	-	-
0.0329974	4012	5221	16	8.0707e-15	1120	965
0.0329744	510	650	0	-	-	-
0.0329707	4010	5132	6	0.00386643	48	7
0.0329699	590	4914	0	-	-	-
0.032967	270	5166	0	-	-	-
0.0329641	4960	5160	4	2.87692e-05	281	125
0.0329518	3022	5143	0	-	-	-
0.0329411	512	5143	0	-	-	-
0.0329387	510	4623	0	-	-	-
0.0329384	650	4330	0	-	-	-
0.0329318	260	650	0	-	-	-
0.0329298	564	4666	3	0.000971533	113	47
0.032921	4914	5216	3	2.47492e-05	515	79
0.0329172	4144	4612	3	7.15267e-06	152	77
0.0329132	3010	5131	0	-	-	-
0.0329131	10	5200	0	-	-	-
0.032904	520	3060	0	-	-	-
0.0329009	4070	4966	0	-	-	-
0.032877	4722	4914	11	2.49121e-09	761	624
0.0328714	4066	4912	2	0.00151332	7	2
0.0328694	240	3008	0	-	-	-
0.0328681	5034	5222	0	-	-	-
0.0328642	510	3013	0	-	-	-
0.0328638	4115	5130	0	-	-	-
0.0328627	5010	5169	2	0.00281762	57	8
0.0328261	190	4066	0	-	-	-
0.032811	520	5143	0	-	-	-
0.0327784	5133	5222	3	0.000637849	86	25
0.0327677	280	5212	0	-	-	-
0.0327654	591	4912	2	0.0084507	165	2
0.0327636	760	3030	0	-	-	-
0.0327524	4270	4960	2	0.00180027	24	1
0.0327449	983	5142	0	-	-	-
0.0327427	330	4966	0	-	-	-
0.0327292	770	5203	0	-	-	-
0.0327247	330	5134	0	-	-	-
0.0327233	563	4623	0	-	-	-
0.0327186	120	310	0	-	-	-
0.0326976	860	4664	0	-	-	-
0.0326848	51	3430	0	-	-	-
0.0326782	4916	5217	22	2.26967e-15	1094	925
0.0326775	3020	5218	0	-	-	-
0.0326703	40	3420	0	-	-	-
0.0326618	563	5168	0	-	-	-
0.0326579	330	3430	0	-	-	-
0.0326523	270	4915	0	-	-	-
0.0326399	5215	5218	17	5.58811e-13	1081	900
0.0326333	3013	4140	0	-	-	-
0.0326213	562	4666	4	3.66267e-07	374	226
0.032608	4914	5140	1	0.0151976	16	0
0.0326056	1230	5214	0	-	-	-
0.0326002	4070	5152	2	0.0199746	1	0
0.032588	565	983	0	-	-	-
0.032587	230	510	0	-	-	-
0.032585	260	4720	0	-	-	-
0.0325768	983	5217	0	-	-	-
0.0325671	591	592	11	3.02038e-11	831	808
0.0325642	3015	4130	0	-	-	-
0.032556	520	4140	0	-	-	-
0.0325426	3430	5410	0	-	-	-
0.032529	5152	5215	4	0.000169389	119	58
0.0325267	190	3030	0	-	-	-
0.0325209	4960	5146	4	7.28974e-06	457	134
0.0324807	920	5166	0	-	-	-
0.0324773	5100	5164	3	0.000141883	147	68
0.0324767	3015	3440	0	-	-	-
0.0324748	760	5031	0	-	-	-
0.0324419	860	3020	0	-	-	-
0.0324404	1230	5162	0	-	-	-
0.0324383	4390	4930	1	0.0149701	32	0
0.0324349	590	5222	1	0.0498249	1	0
0.0324322	920	4723	0	-	-	-
0.0324307	3020	4912	0	-	-	-
0.0324255	4260	5211	0	-	-	-
0.0324003	71	4918	0	-	-	-
0.0323982	920	3022	0	-	-	-
0.0323936	71	5221	0	-	-	-
0.0323907	830	2010	0	-	-	-
0.0323648	260	5100	0	-	-	-
0.0323605	30	190	0	-	-	-
0.03235	4540	5322	0	-	-	-
0.03234	52	240	0	-	-	-
0.0323321	5152	5166	14	1.74542e-05	300	88
0.032324	983	4914	0	-	-	-
0.0323202	4380	4915	8	4.0417e-08	373	257
0.0323162	5214	5217	0	-	-	-
0.0322842	4650	5222	3	5.04861e-05	165	87
0.032266	3430	5120	0	-	-	-
0.0322658	30	4115	0	-	-	-
0.0322586	5031	5134	0	-	-	-
0.0322421	4110	5168	1	0.072601	0	0
0.0322419	561	982	0	-	-	-
0.0322374	520	5322	0	-	-	-
0.0322362	4660	5031	2	0.025	29	0
0.0322196	4270	4612	0	-	-	-
0.0322147	531	5200	0	-	-	-
0.0321922	260	5152	0	-	-	-
0.0321905	4330	5166	3	0.000325147	175	37
0.0321887	340	620	2	0.000938811	77	25
0.0321429	3030	5162	0	-	-	-
0.0321407	3460	4260	0	-	-	-
0.0321338	830	4614	0	-	-	-
0.0321318	564	5166	0	-	-	-
0.0321175	2010	5166	0	-	-	-
0.0321084	531	4672	0	-	-	-
0.0321009	4668	5162	8	6.89177e-07	554	354
0.0320973	563	4964	0	-	-	-
0.0320948	920	4722	0	-	-	-
0.0320914	770	4722	0	-	-	-
0.0320779	230	3420	7	7.45695e-07	503	300
0.0320753	120	3460	0	-	-	-
0.0320706	590	5322	0	-	-	-
0.0320702	4066	5110	2	0.0104167	53	0
0.0320532	1230	5020	0	-	-	-
0.0320361	4110	4340	1	0.0168065	17	0
0.032033	4146	4310	0	-	-	-
0.0320233	520	5014	0	-	-	-
0.032009	250	5162	0	-	-	-
0.0320018	564	5143	0	-	-	-
0.0319982	4114	5322	0	-	-	-
0.0319926	100	534	0	-	-	-
0.0319827	2010	4115	0	-	-	-
0.0319664	564	4810	0	-	-	-
0.0319638	5219	5323	1	0.00955414	14	1
0.0319621	5010	5215	2	0.000329193	42	5
0.0319613	4930	5412	0	-	-	-
0.0319572	4964	5215	0	-	-	-
0.0319236	3430	4666	0	-	-	-
0.0319119	10	4666	0	-	-	-
0.0319112	500	3420	0	-	-	-
0.0319049	830	983	7	0.000181997	158	30
0.031902	520	3008	0	-	-	-
0.0318832	920	4330	0	-	-	-
0.0318727	280	3460	0	-	-	-
0.0318674	640	5131	0	-	-	-
0.0318535	5210	5322	0	-	-	-
0.0318507	3420	4114	1	0.0289003	5	0
0.0318468	190	4140	0	-	-	-
0.0318379	4140	4966	0	-	-	-
0.0318257	510	4540	0	-	-	-
0.0318177	600	4978	0	-	-	-
0.0318065	983	5203	0	-	-	-
0.0317817	4510	5110	1	0.156304	0	0
0.0317771	4142	4722	0	-	-	-
0.0317721	4012	4350	3	3.54599e-05	257	92
0.0317672	3430	5142	0	-	-	-
0.031767	3440	5134	0	-	-	-
0.0317627	4664	5140	2	0.0107817	36	0
0.0317612	565	4070	0	-	-	-
0.0317557	3430	5132	0	-	-	-
0.0317199	4140	4622	12	0.000117555	87	8
0.0317196	5130	5215	1	0.00833333	99	4
0.0317153	4115	5010	3	0.00124524	91	8
0.0317078	4723	5211	1	0.0168065	28	0
0.0317021	5217	5220	0	-	-	-
0.0316994	620	4140	0	-	-	-
0.0316991	4910	5168	3	0.0431381	1	0
0.0316793	4920	4972	0	-	-	-
0.0316727	4130	4150	0	-	-	-
0.0316679	1230	4350	0	-	-	-
0.0316647	280	770	0	-	-	-
0.0316533	512	5217	0	-	-	-
0.0316439	4668	4930	6	3.01474e-06	483	168
0.0316437	30	860	0	-	-	-
0.0316399	280	330	2	0.0005409	60	10
0.0316324	5200	5216	14	9.75659e-09	738	577
0.0316299	4370	4960	5	7.82677e-07	592	237
0.0316118	3010	3030	0	-	-	-
0.031609	5100	5143	0	-	-	-
0.0316031	3440	4520	0	-	-	-
0.0316029	4520	4630	1	0.0141592	33	0
0.0316028	5133	5414	2	0.000432395	258	9
0.0316012	330	5168	0	-	-	-
0.0315973	71	4710	0	-	-	-
0.0315784	830	4915	0	-	-	-
0.0315611	4666	5131	8	2.38839e-06	424	210
0.0315492	100	4964	0	-	-	-
0.0315307	4621	4622	6	1.48687e-06	526	239
0.0315047	4064	5212	2	0.000309176	148	47
0.0314992	5211	5222	4	7.28974e-06	370	224
0.0314917	514	5166	0	-	-	-
0.0314849	3030	5216	0	-	-	-
0.0314807	71	3440	0	-	-	-
0.0314782	4612	5143	2	0.0114777	14	0
0.0314762	4960	5203	4	6.2211e-05	198	102
0.0314668	330	5161	0	-	-	-
0.0314567	250	3320	0	-	-	-
0.0314549	3015	5132	0	-	-	-
0.0314459	564	4720	0	-	-	-
0.0314445	4916	5162	1	0.0313589	1	0
0.0314365	565	5212	0	-	-	-
0.0314355	280	4672	0	-	-	-
0.0314317	4622	5162	24	3.5972e-10	834	706
0.0314243	230	5130	0	-	-	-
0.0314192	562	4974	0	-	-	-
0.0314129	510	520	0	-	-	-
0.0314065	4390	5143	0	-	-	-
0.0313984	601	5203	0	-	-	-
0.031397	4660	5100	6	4.81013e-06	317	158
0.031365	590	4110	0	-	-	-
0.0313413	3008	3040	0	-	-	-
0.0313398	4110	4964	0	-	-	-
0.0313371	4110	4120	7	1.39752e-06	269	120
0.0313091	620	4916	0	-	-	-
0.0313034	4912	5322	0	-	-	-
0.0313017	4260	5412	10	4.40856e-07	521	179
0.0313013	4070	4630	3	0.000102789	134	60
0.0312948	3060	4914	0	-	-	-
0.0312943	51	5152	0	-	-	-
0.0312791	4510	5322	2	0.0461758	1	0
0.0312655	4066	5140	6	0.000144313	136	40
0.0312636	330	5010	0	-	-	-
0.0312626	270	280	0	-	-	-
0.03126	1100	3013	0	-	-	-
0.0312542	30	4910	2	0.021021	21	0
0.0312495	4010	5152	12	2.30657e-05	296	111
0.0312445	510	4145	0	-	-	-
0.0312163	100	4114	0	-	-	-
0.0312107	650	5215	0	-	-	-
0.0312103	3420	5162	0	-	-	-
0.0311715	4350	5168	3	0.0450901	1	0
0.03115	860	5014	0	-	-	-
0.0311487	5031	5166	5	1.06798e-05	304	117
0.0311463	565	5016	0	-	-	-
0.0311417	983	5133	0	-	-	-
0.0311341	4350	5215	1	0.0122699	8	0
0.0311138	3430	4915	0	-	-	-
0.0311025	51	5340	0	-	-	-
0.0310876	4960	5164	4	1.33309e-05	333	143
0.0310818	380	563	0	-	-	-
0.0310783	4620	4962	0	-	-	-
0.0310777	565	4612	0	-	-	-
0.0310738	830	4710	0	-	-	-
0.0310719	280	600	0	-	-	-
0.0310661	51	4668	0	-	-	-
0.0310629	512	5221	0	-	-	-
0.0310596	5031	5215	4	1.67639e-07	448	159
0.0310542	4066	5322	1	0.161574	0	0
0.0310398	562	4510	2	0.00309455	117	25
0.0310316	565	4350	0	-	-	-
0.0310298	30	270	0	-	-	-
0.0310254	860	4540	0	-	-	-
0.0310072	4930	5322	1	0.0136986	2	0
0.0309988	4140	5100	0	-	-	-
0.030998	3013	4530	0	-	-	-
0.0309864	564	3420	0	-	-	-
0.0309856	40	4912	0	-	-	-
0.0309826	760	860	0	-	-	-
0.0309808	4340	5340	0	-	-	-
0.0309802	4621	4972	0	-	-	-
0.0309632	4114	5340	0	-	-	-
0.0309487	860	5416	0	-	-	-
0.0309456	40	4066	0	-	-	-
0.0309443	860	5010	0	-	-	-
0.0309432	3430	4630	0	-	-	-
0.0309417	5120	5162	3	1.04503e-05	193	94
0.0309387	3460	4110	0	-	-	-
0.0309345	5132	5215	2	0.00023872	90	11
0.0309279	512	4720	0	-	-	-
0.0309123	591	5220	0	-	-	-
0.0309114	5218	5219	11	1.22443e-10	964	675
0.0308999	5221	5414	0	-	-	-
0.0308918	5145	5204	0	-	-	-
0.0308902	601	5322	0	-	-	-
0.0308865	4340	4380	0	-	-	-
0.0308253	5212	5320	0	-	-	-
0.0308174	650	4966	0	-	-	-
0.0308129	4142	5412	0	-	-	-
0.0307918	4962	5130	0	-	-	-
0.0307895	620	920	0	-	-	-
0.0307754	10	4150	0	-	-	-
0.0307732	4666	4810	18	1.85749e-10	766	570
0.0307561	3030	4141	0	-	-	-
0.0307532	4920	5164	6	6.02305e-06	301	203
0.0307467	4114	5034	6	0.00242696	24	7
0.0307309	920	5034	0	-	-	-
0.0307274	3022	5322	0	-	-	-
0.0307253	600	4622	0	-	-	-
0.030722	30	4978	0	-	-	-
0.0307215	4151	4972	0	-	-	-
0.0307109	4727	5169	2	0.00034057	124	41
0.0307099	534	5131	0	-	-	-
0.0306994	100	5143	0	-	-	-
0.0306962	4720	4973	0	-	-	-
0.0306951	562	4620	1	0.0143266	47	0
0.0306932	500	4710	0	-	-	-
0.0306927	240	5034	0	-	-	-
0.0306919	4120	5168	3	0.00172001	36	5
0.0306905	4668	4962	3	3.44174e-05	122	41
0.0306888	240	531	0	-	-	-
0.0306823	240	4110	0	-	-	-
0.0306702	563	4978	0	-	-	-
0.0306654	4530	4962	0	-	-	-
0.0306598	500	4390	0	-	-	-
0.0306579	380	5222	0	-	-	-
0.0306522	4310	5143	2	0.0140845	198	0
0.0306483	5140	5217	0	-	-	-
0.0306474	3440	4672	0	-	-	-
0.0306418	563	4540	0	-	-	-
0.0306161	650	3030	0	-	-	-
0.0306157	4914	5169	8	9.65198e-08	554	353
0.0306148	4066	4978	1	0.00537634	262	5
0.0306111	562	5010	1	0.00911854	49	2
0.0306101	590	3022	0	-	-	-
0.0306087	590	5221	0	-	-	-
0.0305992	5145	5219	1	0.015015	29	0
0.0305985	3022	5014	0	-	-	-
0.0305979	4070	5131	0	-	-	-
0.0305898	982	4370	0	-	-	-
0.0305838	4914	5142	7	8.03621e-07	389	255
0.0305588	270	4114	0	-	-	-
0.030537	4660	4978	0	-	-	-
0.0305284	100	250	0	-	-	-
0.0305234	770	3030	0	-	-	-
0.0305229	830	4520	0	-	-	-
0.030518	280	5010	1	0.0125392	17	0
0.0305162	770	5034	0	-	-	-
0.0305058	5211	5220	13	1.53571e-12	1044	851
0.0305038	500	1230	0	-	-	-
0.0305017	4916	5120	0	-	-	-
0.0305013	4146	5322	0	-	-	-
0.0304977	10	5205	0	-	-	-
0.0304935	4530	5221	3	0.000761224	129	51
0.0304895	4540	4630	1	0.0377919	3	0
0.0304869	4514	5211	0	-	-	-
0.0304788	3410	4142	0	-	-	-
0.0304685	534	5412	0	-	-	-
0.0304503	983	4070	0	-	-	-
0.0304426	5016	5134	2	0.00462072	106	7
0.0304423	860	5204	4	0.000627089	107	4
0.0304308	500	4622	0	-	-	-
0.0304218	10	591	0	-	-	-
0.0304212	4020	4115	0	-	-	-
0.0304064	4330	4730	0	-	-	-
0.0304008	650	5203	0	-	-	-
0.0304008	565	5134	0	-	-	-
0.030397	5212	5222	8	1.43953e-08	763	512
0.0303934	4151	4915	15	9.00928e-07	620	374
0.0303933	3030	4916	0	-	-	-
0.0303916	830	4666	0	-	-	-
0.0303877	5169	5217	1	0.0408163	3	0
0.0303785	520	3410	0	-	-	-
0.0303735	1100	4146	19	0.00016988	108	22
0.0303718	531	5110	0	-	-	-
0.0303703	565	4140	0	-	-	-
0.0303701	565	4146	1	0.0371481	1	0
0.030359	3440	5120	0	-	-	-
0.0303541	10	520	6	0.000224568	199	46
0.0303505	4914	5031	2	0.000125943	442	89
0.0303481	4350	5014	1	0.0107527	10	0
0.0303468	534	4350	0	-	-	-
0.0303458	4150	5162	4	2.53978e-05	290	179
0.0303353	564	5200	0	-	-	-
0.0303352	561	5414	0	-	-	-
0.0303321	4146	5130	0	-	-	-
0.0303147	280	970	0	-	-	-
0.0303138	5134	5222	3	3.73788e-06	160	45
0.0303098	4151	5205	34	1.71432e-09	981	809
0.0303027	4145	5134	5	9.97093e-06	202	66
0.0302906	260	4115	0	-	-	-
0.0302899	3015	4612	0	-	-	-
0.0302838	4360	4668	1	0.0420114	3	0
0.0302707	5211	5414	1	0.00625	127	3
0.0302591	4978	5410	0	-	-	-
0.0302521	3320	3460	0	-	-	-
0.0302508	1100	4120	0	-	-	-
0.0302376	564	1230	0	-	-	-
0.030233	4110	4650	0	-	-	-
0.0302256	562	770	0	-	-	-
0.0302195	270	500	0	-	-	-
0.0302037	4115	5016	3	0.000298686	134	29
0.0301934	3015	4622	0	-	-	-
0.0301876	4916	5322	0	-	-	-
0.0301858	512	4620	0	-	-	-
0.0301835	3020	5216	0	-	-	-
0.0301754	564	3008	0	-	-	-
0.0301729	563	5169	0	-	-	-
0.0301688	860	4330	0	-	-	-
0.0301502	760	5133	0	-	-	-
0.0301464	3022	4110	2	0.00536235	19	6
0.0301437	4930	5161	6	1.86446e-06	439	162
0.0301363	531	3460	0	-	-	-
0.030136	240	260	0	-	-	-
0.0301166	563	4510	0	-	-	-
0.030107	4721	4910	0	-	-	-
0.0301065	3060	5110	4	4.99674e-06	366	139
0.0301035	4110	5152	1	0.0144092	5	0
0.030102	3040	4110	0	-	-	-
0.030088	562	3440	0	-	-	-
0.0300875	4070	4110	0	-	-	-
0.0300874	510	514	2	2.35372e-05	378	74
0.0300858	920	4721	0	-	-	-
0.0300765	860	5214	0	-	-	-
0.0300574	510	4730	0	-	-	-
0.0300405	4612	5110	0	-	-	-
0.0300398	4977	5211	0	-	-	-
0.0300365	562	5133	0	-	-	-
0.0300337	5030	5031	17	6.52054e-13	992	914
0.0300303	5010	5150	0	-	-	-
0.0300169	512	601	0	-	-	-
0.0300156	380	5215	0	-	-	-
0.030014	4964	5034	0	-	-	-
0.0300057	3440	5162	0	-	-	-
0.0299983	3440	4380	0	-	-	-
0.029993	5217	5410	0	-	-	-
0.0299917	5200	5212	20	3.30149e-13	1088	1035
0.0299827	4390	5132	0	-	-	-
0.0299573	590	4976	0	-	-	-
0.029957	3015	4978	0	-	-	-
0.0299491	3440	5414	0	-	-	-
0.0299437	4114	5221	2	0.000459108	23	3
0.0299347	565	5217	0	-	-	-
0.029927	4360	4666	3	0.0126553	7	0
0.0299257	512	5203	0	-	-	-
0.0299231	860	5134	0	-	-	-
0.0299221	3440	4612	0	-	-	-
0.0299102	920	5416	0	-	-	-
0.0299074	561	5130	0	-	-	-
0.0299058	190	760	0	-	-	-
0.0298966	564	601	0	-	-	-
0.0298878	5168	5212	4	0.000206835	98	34
0.0298874	3060	4910	0	-	-	-
0.0298821	4910	5130	0	-	-	-
0.0298714	4660	4962	0	-	-	-
0.0298565	51	4310	0	-	-	-
0.0298534	4920	4960	1	0.0058309	122	8
0.0298471	380	1230	0	-	-	-
0.0298471	340	500	0	-	-	-
0.0298386	4916	5110	3	0.000102877	333	82
0.0298123	10	592	0	-	-	-
0.0298068	4960	4962	0	-	-	-
0.0298059	3022	5221	0	-	-	-
0.0298053	4910	5014	0	-	-	-
0.0298021	3030	3430	10	1.11144e-10	799	605
0.0297996	10	4964	2	9.04895e-05	353	60
0.0297845	3420	4720	0	-	-	-
0.0297834	4340	4730	0	-	-	-
0.029783	512	5014	0	-	-	-
0.0297829	4660	4930	5	1.20589e-06	529	174
0.0297661	4710	5131	0	-	-	-
0.0297576	3018	5031	0	-	-	-
0.0297379	3060	5222	0	-	-	-
0.0297351	5142	5160	18	4.60204e-13	905	757
0.0297344	5132	5203	2	0.0130653	10	0
0.0297151	4720	5110	3	5.42711e-05	518	115
0.0297094	4350	4720	1	0.018018	24	0
0.0297068	4145	5166	5	0.0058515	9	1
0.0297036	534	4918	0	-	-	-
0.0297034	4721	4930	1	1	0	0
0.0297012	1230	5120	0	-	-	-
0.0296654	4960	5134	0	-	-	-
0.0296579	51	760	0	-	-	-
0.0296466	280	5161	0	-	-	-
0.0296415	4350	5133	3	0.00252977	33	3
0.029637	100	4710	0	-	-	-
0.0296339	1230	4722	0	-	-	-
0.0296217	565	4912	3	0.000249871	342	65
0.0296201	520	4721	0	-	-	-
0.029605	520	4142	1	0.0726982	0	0
0.0296044	3440	5410	0	-	-	-
0.0295825	564	4141	0	-	-	-
0.0295755	51	4710	0	-	-	-
0.0295618	4340	4910	3	5.60467e-05	268	126
0.0295607	510	5200	0	-	-	-
0.0295597	830	5010	0	-	-	-
0.0295372	3440	5132	0	-	-	-
0.0295317	480	4540	0	-	-	-
0.0295313	4142	5416	0	-	-	-
0.0295282	4070	4340	0	-	-	-
0.0295256	3430	4920	0	-	-	-
0.0295182	4330	4977	0	-	-	-
0.0295147	4020	4110	0	-	-	-
0.029508	3010	3430	0	-	-	-
0.0295051	4664	5213	10	7.35359e-10	799	449
0.0294823	5100	5212	3	7.28974e-06	381	126
0.0294713	4114	4670	0	-	-	-
0.0294614	4066	5134	3	0.00173473	58	5
0.0294522	4150	5120	0	-	-	-
0.0294321	561	4370	0	-	-	-
0.0294274	270	4666	0	-	-	-
0.0294266	3420	4530	0	-	-	-
0.0294257	230	3410	7	8.26132e-08	567	393
0.0294249	4390	4623	0	-	-	-
0.0294243	4260	4915	0	-	-	-
0.029421	562	4140	0	-	-	-
0.029414	4910	4911	4	0.000210052	162	78
0.0294004	4810	5131	12	8.73263e-10	735	559
0.0293899	4710	5221	0	-	-	-
0.0293883	830	3015	0	-	-	-
0.0293875	983	5110	0	-	-	-
0.0293831	10	561	3	9.15016e-05	107	16
0.0293812	531	4614	0	-	-	-
0.0293738	4070	5162	3	0.000470403	123	44
0.0293733	310	510	0	-	-	-
0.0293628	4070	5215	3	1.45449e-05	209	90
0.029362	4622	4977	0	-	-	-
0.0293572	71	4210	0	-	-	-
0.0293559	500	4621	0	-	-	-
0.0293479	970	5152	0	-	-	-
0.0293477	100	480	0	-	-	-
0.0293381	4540	4623	0	-	-	-
0.0293378	510	5340	0	-	-	-
0.0293377	4070	4380	4	6.54155e-05	227	125
0.0293377	640	4070	0	-	-	-
0.0293372	5131	5166	4	0.000146669	159	40
0.0293301	350	4350	0	-	-	-
0.0293067	520	5166	0	-	-	-
0.0292797	4530	5100	5	0.000603819	58	14
0.0292773	1200	5160	0	-	-	-
0.0292698	563	982	0	-	-	-
0.0292697	562	4130	0	-	-	-
0.0292599	4066	4115	1	0.00946372	27	1
0.0292539	280	5020	0	-	-	-
0.0292493	860	4114	0	-	-	-
0.0292269	500	983	5	0.000111882	181	23
0.0292252	500	5134	0	-	-	-
0.0292144	830	4962	0	-	-	-
0.029204	3410	4390	0	-	-	-
0.0291953	512	5168	0	-	-	-
0.029188	4130	5166	0	-	-	-
0.0291752	5014	5212	0	-	-	-
0.0291677	564	5100	0	-	-	-
0.0291593	71	4350	0	-	-	-
0.0291566	5100	5340	0	-	-	-
0.0291559	5212	5219	8	5.14261e-08	838	422
0.0291361	4920	5110	0	-	-	-
0.0291353	4530	5205	9	4.01846e-06	320	120
0.0291319	120	5416	0	-	-	-
0.0291195	4070	4912	3	0.00168481	61	8
0.0291105	500	601	0	-	-	-
0.0290852	4115	4722	1	0.0485091	1	0
0.0290756	40	5010	0	-	-	-
0.0290325	3015	4614	0	-	-	-
0.0290281	4070	4960	4	1.45449e-05	465	128
0.0290236	190	4962	0	-	-	-
0.0290197	4520	4910	1	0.0473994	1	0
0.0290087	4910	4914	13	1.62641e-11	936	805
0.0290078	4916	5211	5	0.000245654	83	34
0.0290004	561	4066	0	-	-	-
0.0289949	4520	5414	0	-	-	-
0.0289913	100	310	0	-	-	-
0.0289815	240	534	0	-	-	-
0.0289592	4210	4330	0	-	-	-
0.0289579	4630	4916	0	-	-	-
0.0289513	600	3410	0	-	-	-
0.0289487	350	4978	0	-	-	-
[truncated: 25,731 more rows]
