# Supplementary material for: Pathway-based Bayesian inference of drug–disease interactions
Source: Royal Society of Chemistry journal article supplement (doi:10.1039/c4mb00014e), 2014-04-03
Supplement: c4mb00014e2.xlsx [file c4mb00014e2.xlsx]

## Sheet: Sheet1
Pathway rank profiles
'SULFATHIAZOLE'	'CIMETIDINE'	'TROLEANDOMYCIN'	'NAPHAZOLINE'	'SULPIRIDE'	'MINAPRINE'	'CINCHOCAINE'	'AMILORIDE'	'LEVODOPA'	'DOXYLAMINE'	'PYRIMETHAMINE'	'TICLOPIDINE'	'OXYBUPROCAINE'	'MICONAZOLE'	'PREDNISONE'	'AMPROLIUM'	'IDOXURIDINE'	'ETHAMBUTOL'	'HEXAMETHONIUM BROMIDE'	'DICYCLOVERINE'	'OXETACAINE'	'ISOXSUPRINE'	'THIORIDAZINE'	'HYDROCHLOROTHIAZIDE'	'CAPTOPRIL'	'PHENAZONE'	'DIFLUNISAL'	'AMYLOCAINE'	'PHENIRAMINE'	'ACEBUTOLOL'	'DIPHEMANIL METILSULFATE'	'SULFAGUANIDINE'	'MINOXIDIL'	'4-HYDROXYPHENAZONE'	'NICLOSAMIDE'	'LIDOCAINE'	'TOLAZOLINE'	'TOLNAFTATE'	'TRIMETHOBENZAMIDE'	'METRONIDAZOLE'	'KHELLIN'	'APOMORPHINE'	'NALOXONE'	'BROMOCRIPTINE'	'GLIPIZIDE'	'VERAPAMIL'	'ERYTHROMYCIN'	'COTININE'	'ZIMELDINE'	'AMOXAPINE'
5160	5160	5160	5160	5160	5142	5160	5142	5160	5160	5160	5160	5160	5160	5160	5160	5160	5160	5160	5160	5160	5160	5160	5160	5160	5160	5160	5160	5160	5160	5160	5142	5160	5160	5145	5160	5142	5142	5142	5160	5160	5160	5160	5160	5160	5142	5160	5142	5160	5160
5142	5145	5142	5142	5142	5160	5142	5160	5142	5142	5145	5145	5142	5145	5142	5142	5142	5142	5142	5145	5142	5142	5142	5142	5142	5142	5142	5145	5142	5142	5142	5160	5142	5145	5160	5142	5160	5160	5160	5142	5142	5142	5142	5142	5142	5160	5142	5160	5142	5142
5145	5140	5145	5220	5145	3020	5145	5145	5145	5145	5140	5223	5220	5142	5140	5145	3020	5145	3020	5142	5145	5220	5145	3020	5145	5145	3020	5142	5145	5220	5145	3020	3020	5140	5142	5145	5220	3020	5220	5145	5220	5220	5220	5220	3020	5220	3020	5220	3020	5145
5140	5223	5220	3020	5140	5220	5140	3020	3020	3020	5223	5140	3020	5223	5145	5220	5214	5140	5220	5223	5223	3020	3020	5220	5140	5220	5145	5140	5140	3020	5140	5220	5220	5223	5223	5140	3020	5220	3020	3020	3020	5145	3020	5140	5220	5145	5220	3020	5220	5223
5223	5219	3020	5145	3020	5214	5223	5220	5140	5220	5142	5142	5219	5140	3020	3020	5145	3020	5145	3020	3020	5145	5223	5145	3020	3020	5214	5223	3020	5145	3020	5145	5145	5142	5214	3020	5145	5214	5219	5140	5145	3020	5145	5145	5219	3020	5145	5145	5145	5140
3020	5142	5214	5219	5219	5145	3020	5223	5223	5214	5219	5214	5145	5210	5223	5214	5220	5223	5214	5140	5140	5219	5214	5214	5223	5214	5220	5219	5223	5219	5223	5214	5219	5210	3020	5223	5219	5219	5214	5214	5219	5219	5219	3020	5145	5161	5214	5219	5219	3020
5219	5210	5161	5214	5223	5219	5214	5214	5219	5140	5210	5210	5223	5214	5219	5219	5223	5219	5219	5214	5220	5214	5220	5140	5219	5219	5140	5210	5219	5214	5219	5219	5140	5219	5220	5219	5214	5223	5223	5219	5140	5214	5214	5219	5214	5219	5219	5214	5214	5210
5220	5214	5219	5223	5214	5223	5219	5219	5220	5216	5214	3020	5214	3020	5214	5140	5219	5220	5140	5210	5210	5223	5210	5219	5214	5223	5219	3020	5214	5140	5214	5223	5214	3020	5216	5214	5223	5145	5145	5223	5214	5204	5223	5214	5140	5223	5223	5223	5223	5214
5210	3020	5223	5140	5220	5140	5210	5140	5214	5219	3020	5219	5140	5219	5210	5223	5140	5214	5223	5219	5219	5140	5219	5223	5210	5140	5223	5214	5210	5223	5210	5140	5223	5214	5020	5220	640	640	5210	5220	5223	5140	5210	5020	5223	5214	5140	5140	5140	5219
5214	5213	5140	5210	5210	5210	5220	5020	5210	5223	5213	5220	5210	5220	5220	5216	5213	5210	5210	5220	5214	5020	5140	5210	5220	5210	5213	5220	5220	5210	5220	5213	5213	5213	5218	5210	5210	5213	640	5210	5210	5210	5140	5223	5210	5213	5210	5210	5213	5220
5213	5220	5210	5213	5213	5216	5213	5210	5213	5213	5220	5213	5213	5213	5213	5210	5020	5213	5020	5213	5213	5210	5213	5020	5213	5216	5210	5213	5213	5020	5213	5020	5210	5220	5140	5213	5213	5140	5140	5213	5020	5223	5213	592	5213	5140	5020	5020	5210	5213
5020	5330	5213	640	5330	5213	5020	5213	5020	5210	5218	5020	5020	5218	5161	5213	640	5020	5213	5020	640	5213	5020	5213	5330	5213	640	5330	5020	5213	5330	640	640	5330	5210	5020	5140	5216	5213	5020	5213	5213	5020	5210	5020	592	5213	5213	5020	5218
5330	5218	5020	592	5020	640	5218	640	5330	4912	5330	5218	640	5020	591	5020	5210	5161	640	5218	5161	20	5216	5216	5020	5020	5216	5020	5330	592	5020	5216	5216	5218	5219	5330	5020	5161	5020	5330	20	592	640	20	640	5210	640	640	592	5020
5218	591	5216	5020	5218	5020	5330	5216	640	5020	591	5330	592	5216	5330	640	5330	5330	5216	5330	5218	592	640	640	5218	20	5020	5218	5218	20	5218	5210	5020	591	5213	640	592	5020	592	5161	592	5020	592	5213	5330	5020	5216	592	20	5330
591	5020	640	20	20	20	591	5161	591	640	20	5216	5330	5330	5020	5212	5216	640	592	5216	5330	640	5218	20	591	640	4912	5161	591	640	591	4912	591	5020	592	5218	5330	4912	5330	640	640	20	5161	1200	592	20	592	20	640	640
640	20	592	5218	592	592	640	5218	5218	5218	5020	591	20	591	5218	592	5204	5218	5330	591	5020	1200	5330	592	640	5218	5330	591	5161	5216	640	20	592	20	5204	591	591	5210	20	5218	591	640	20	5218	20	5218	5161	5330	5218	5216
592	592	5218	5216	591	5330	592	592	592	20	5161	592	591	592	20	20	5218	591	20	592	591	5218	592	591	20	592	5218	640	640	591	20	5330	5330	592	1200	5216	20	5330	5216	20	1200	5218	591	591	5218	591	5330	5216	5330	591
20	1200	20	5330	640	5218	5216	4912	20	1200	1200	20	5216	20	640	5218	20	20	591	640	592	5216	591	5330	5216	1200	20	20	20	5330	592	592	20	640	20	20	4912	592	5161	592	5216	1200	5330	640	591	5216	20	591	1200	592
5161	1230	591	5161	1200	5212	20	20	5216	591	592	5161	5218	1200	592	5330	592	5216	5218	5161	5216	5330	1200	5218	592	4912	1200	592	592	1200	5216	1200	5218	1200	591	592	5216	20	591	591	5161	591	5216	5216	5216	1200	591	5161	5216	1200
5216	640	5204	591	5161	4912	5161	1200	5161	5212	5216	1200	5204	5161	5216	591	591	592	5161	5030	1200	591	4912	1200	5161	591	591	5216	5216	5218	1200	5218	1200	1230	4912	1200	5204	1200	5218	5216	5218	5330	5218	5330	1200	640	5218	5218	591	5161
1200	5216	5330	1200	5216	5161	1200	591	1200	592	1230	4064	1200	4064	4912	4912	1200	4912	1200	1200	20	5161	20	5161	4912	5330	592	1200	5204	5161	5204	591	4912	5216	4064	5161	1200	591	4912	1200	5330	5216	1200	1230	5161	5330	5204	5204	5161	20
4912	4912	1200	5204	4912	591	5204	5330	4912	5330	640	4912	4912	5030	1200	4914	4912	1200	4912	20	4912	4912	5204	4912	1200	5161	5161	5204	1200	4912	5161	5161	5161	5204	5330	5204	5218	5218	1200	5204	4912	5161	5204	4912	4912	1230	4912	1200	1230	5030
5204	5204	4912	4912	1230	1200	4912	5204	1230	5161	4912	4664	5161	4912	5204	1200	5161	5204	5204	4912	5204	5204	5030	5204	5204	4915	4914	4915	4912	5204	4912	4914	4914	4912	640	4912	5161	4914	5204	1230	5204	980	4912	5161	1230	4912	1200	4915	4912	4912
5030	5323	5212	4064	5204	4914	4064	5030	5204	4914	5204	640	4915	5204	1230	5161	4064	4915	5212	4064	410	1230	4064	5212	5212	5204	410	1230	1230	5212	1230	410	5212	5161	4664	1230	4064	410	410	4912	1230	1230	4064	10	5204	5204	4064	4912	5212	1230
1230	5161	4915	5212	4915	5204	1230	4064	5212	410	410	1230	5217	640	4064	410	1230	1230	4064	5323	1230	4064	5212	4064	1230	5212	5204	4912	4064	1230	4064	5204	5204	5323	5212	5212	4664	5212	1230	4915	4915	4912	5030	5212	5212	5030	4915	4064	5204	5323
5212	4064	1230	4664	4064	410	4664	1230	4064	5204	4914	5030	1230	1230	4664	5217	410	4064	5030	5204	4914	4915	5320	1230	4064	4914	5212	5212	5030	4064	5323	5212	4064	4064	1230	4064	4915	5204	5217	4064	4064	4064	4664	5204	4064	5212	5030	1230	10	410
4064	5212	4064	410	5212	10	5212	4915	4664	5217	5323	5204	410	5212	5212	5204	4914	410	4664	5212	5030	5212	5161	410	4915	410	1230	5323	5212	5030	4664	4064	410	4664	5161	410	410	5217	4064	5323	4914	5212	1230	4915	5323	4664	5212	4664	4064	4064
410	4915	4664	1230	5323	4064	4915	5212	5323	1230	5212	5212	4914	4664	5030	1230	4664	5212	1230	1230	5212	4664	5323	4664	5030	4064	4064	410	5323	4664	5030	1230	4664	5030	5030	4664	1230	1230	5030	3440	5212	4664	5323	4064	4664	4064	4664	5212	410	5204
5323	410	4914	5030	5030	1230	5323	5320	5030	4064	4064	5323	4064	5323	5323	562	5030	5323	5323	4664	5320	5030	4664	5030	410	1230	5217	4064	4664	410	5212	5217	1230	410	5323	4914	5212	5030	5323	5212	5030	410	5212	5217	5030	5320	1230	5030	4914	5212
4664	4664	5030	5131	4664	5217	5030	4664	410	562	5030	410	5212	5320	410	4064	5212	4914	4915	5320	5323	5323	410	4914	4914	5030	5030	5030	410	5323	410	5030	5217	4915	5320	5323	280	562	5322	4664	4664	5030	410	4664	5320	410	5323	5323	5217	5320
5131	5030	410	5323	410	4664	10	5323	5320	10	5217	5320	860	410	5320	3030	5323	5217	410	410	5217	410	1230	5323	4664	4664	4915	5217	860	5320	4914	4664	5030	5212	983	5030	5320	4064	4664	5030	410	5323	10	5030	410	5323	410	410	5323	4664
5211	860	5323	3030	3440	3030	410	410	4915	3030	4664	5133	10	5133	980	5320	980	4664	5320	5166	4664	860	983	5320	5323	3440	4664	4664	5320	4914	5320	10	5323	5320	980	5217	3440	4664	4915	410	5323	10	4915	4151	10	5211	5320	5320	5030	5166
860	5320	5217	5110	5217	562	860	5100	590	4664	562	5166	5323	5166	4914	5030	830	5030	4914	5133	4064	5320	10	4915	5320	5323	5323	5320	4066	4915	5217	5323	562	5133	5215	4915	5030	3030	5320	4066	5320	4913	5320	250	5217	5217	10	10	4664	10
5320	5164	3030	5320	5320	860	5320	10	5217	5030	920	983	5030	983	4540	280	5320	5320	10	5031	5132	5215	240	920	3030	3030	5320	4914	4915	562	4140	562	10	3030	410	860	5323	4930	5212	280	5215	5217	4914	410	52	10	5217	5100	3030	240
240	5133	5215	3440	280	5030	3440	4914	601	5323	5320	5215	4664	4915	10	5323	5217	3030	860	983	52	3430	5166	5217	860	562	562	860	10	280	4915	4915	4915	10	10	5320	10	5323	4914	860	5211	5320	280	5323	531	983	5100	5217	5211	5133
565	4622	4960	4914	3030	5320	4066	3440	52	5132	4964	4151	52	10	5217	4664	10	4066	562	5322	562	5217	5215	562	280	10	52	52	5414	5217	10	4510	5132	980	4151	260	4540	600	562	5320	562	4151	500	983	4915	4914	4914	4914	860	4151
3430	3030	5320	4915	4914	5323	920	120	4914	5320	10	5322	4066	4151	4915	983	280	5166	5217	4066	240	4066	5322	3030	5217	5320	4510	4070	5217	10	980	5320	5320	4622	4915	5211	3030	4510	52	4914	10	4914	52	4930	3440	280	983	4070	5320	4066
5110	4930	4930	380	10	5132	5166	380	5221	4930	5134	860	590	5031	860	4915	510	562	5166	4151	5221	10	5133	3440	562	4510	5134	5131	980	5215	52	5221	280	5215	3430	280	5211	3440	4540	5322	5217	983	5217	5320	5211	100	5215	5131	4915	100
3030	562	10	4070	5211	5110	5217	5217	3030	4510	4510	250	5132	5217	5133	5200	5412	40	590	240	10	983	4151	280	5100	5217	5221	983	5166	52	30	5134	5134	5222	5217	3440	4914	5412	5131	10	3440	4915	531	5215	5131	5131	860	860	562	983
5014	3440	983	5222	562	4915	5133	4723	4210	5134	860	10	5320	5322	500	10	590	10	980	860	5166	52	860	531	4930	5110	5162	5100	52	4930	590	4066	4510	860	5166	983	601	5320	5221	3430	71	5322	5221	4914	500	240	4930	5215	5132	5215
4070	5217	40	860	980	4930	5211	5031	500	860	5133	4066	500	5131	3030	4930	100	5215	565	5215	600	5100	3430	4066	10	4210	4930	4066	4914	980	280	3440	600	3440	250	52	5221	280	5211	565	280	5131	3030	860	860	500	4140	980	4510	860
4914	5162	4730	10	4140	565	3420	5215	10	40	71	240	5131	5215	280	5132	4915	3440	5322	4914	4510	562	100	10	4510	4930	71	10	920	500	562	5215	4930	5221	240	562	52	860	5414	5217	5131	5221	590	500	5215	5322	5211	52	4930	562
561	10	860	4930	983	4510	5131	5322	860	5412	52	4668	100	4668	5215	71	5134	983	5222	4915	4070	4914	980	5131	983	380	10	5132	5215	3030	860	52	5131	5217	5162	5131	563	5215	4070	52	600	860	860	3430	4914	5166	5131	983	52	330
40	4914	100	565	860	5134	5215	4930	5131	71	240	3430	980	240	562	5412	30	5134	4930	4668	40	5110	5031	5211	30	5222	5132	600	534	860	600	4930	71	4914	5133	10	4612	52	601	920	4140	380	5215	3440	4930	330	601	4930	5222	5217
4960	500	5164	562	5031	4960	250	983	5132	280	4151	4915	4962	3430	4070	4510	3440	860	3030	5217	5211	4930	280	4070	4140	3460	4070	980	590	5412	5215	5131	52	563	4668	4140	650	5134	600	40	980	4930	3440	40	5221	52	980	100	5031	4914
4915	5412	5168	4210	601	5222	980	4350	531	3420	5322	5222	920	250	4930	5134	4070	4930	5215	5131	510	5222	5221	5110	5215	71	5215	100	5100	71	920	600	4668	5164	100	4070	5166	30	860	5215	5412	240	4930	5133	980	4151	5221	5211	5110	4915
10	4066	4114	5217	4260	40	4914	4721	5211	5110	3030	5152	4510	100	5131	4340	920	5132	3440	5162	980	5322	250	5414	5031	5215	240	5222	500	4140	4930	860	30	4540	4913	3030	5414	4114	280	5131	860	100	4070	4960	4070	4066	4070	5222	5412	5131
4720	531	4110	4960	5215	5131	983	4140	4540	5221	51	4622	5221	5034	4010	51	5131	4722	5414	980	4915	280	330	860	52	5031	30	4960	4930	5211	5131	3030	4070	5131	5131	534	562	71	4930	30	30	5215	5131	3030	983	3430	52	4066	250	40
330	920	600	4066	52	983	4151	100	4916	600	5132	5131	4668	4070	5211	4960	982	590	380	4530	4910	5131	4915	5215	5133	5131	514	4930	983	4722	4066	4964	983	52	860	4066	5110	4964	5215	4930	52	52	650	5222	5110	30	531	330	565	5031
250	5215	4140	510	4070	3420	4140	3430	4140	240	4915	5162	983	5152	4622	5169	5132	52	5131	531	512	4964	5162	4964	71	52	980	5133	5131	5134	512	71	5412	280	5322	4964	983	5166	10	590	260	534	5133	5200	5133	5215	5110	40	510	650
5222	71	5222	350	5133	71	4930	562	5120	4964	4622	5200	40	4914	983	4964	51	4510	5211	40	5162	4540	5222	4666	5164	4066	4622	5166	280	5131	380	280	5162	4930	4070	4510	5215	5131	4510	4070	4930	5166	5166	52	601	565	590	280	3430	280
350	4140	3430	52	5131	510	4721	514	4330	565	250	5031	601	5162	920	4066	4510	4114	52	330	4530	980	4930	4140	5211	5412	5131	512	40	5221	5211	3420	860	983	5152	4668	5217	5200	564	5211	983	5211	980	260	5222	860	4668	5221	5134	3430
601	52	565	330	4964	5412	330	5162	3440	4340	4930	4010	3430	5222	4066	5162	4930	380	5221	4010	5215	4070	5131	5200	4964	860	4964	4520	5211	983	983	5132	601	4916	4960	4960	531	4915	3440	500	4070	3430	983	100	4066	4070	3440	3030	983	5211
590	280	514	5100	71	5169	4070	860	4066	52	5012	5034	5203	3440	5412	5222	983	51	983	562	380	5211	4913	5222	980	280	5100	5215	5133	3440	4670	51	5215	5110	5200	4110	4146	100	240	980	250	340	5211	5152	260	4915	4260	5164	980	5162
52	4623	980	5215	4012	4964	5414	240	4930	5162	3430	4070	4721	4110	52	531	5215	5131	650	10	4151	590	5211	4930	531	5134	5211	40	5221	531	250	980	5221	562	5221	4340	4960	5162	4140	983	590	280	40	4141	480	5110	280	4966	4540	4150
4621	983	52	71	4930	500	562	4330	5215	5222	5166	3420	4910	980	3440	30	240	601	330	3030	4964	920	4914	983	5222	240	510	5164	3022	4070	4510	40	3430	4070	5222	30	4330	601	5120	5166	5221	4066	4370	5131	280	5132	40	650	71	980
30	5131	4012	240	590	350	620	4916	5110	601	5412	563	4340	4066	5164	40	52	5222	350	563	71	5031	4110	52	534	5211	310	5134	4722	590	4370	4910	4530	5211	5132	5215	4066	4910	5222	600	4510	920	4066	5031	590	590	5222	590	5169	4630
5010	340	4340	980	4115	534	52	52	5133	4915	4723	5134	4540	4150	30	3420	860	980	4070	510	5134	5132	600	980	5131	4964	3430	4622	5222	5100	5222	5412	4964	3430	601	980	860	4666	531	520	5133	4540	5031	970	4210	3030	4721	531	280	512
4140	4666	562	5134	3430	240	4960	5131	983	5169	3460	4914	4070	5200	4960	4370	563	5211	5110	4930	4066	4623	4066	240	5412	983	860	3430	340	4066	4070	5169	5200	4666	280	4930	5131	5221	4530	4668	5200	650	563	4721	4540	4140	500	4210	5215	5034
3010	5034	5031	4150	534	4114	982	4270	280	4114	5215	564	5120	4622	5221	4141	4913	71	5133	250	500	510	5200	71	500	5221	380	5110	4622	30	4540	4114	40	51	5211	71	4666	4340	5132	250	340	562	5110	4978	40	4930	260	565	5200	250
190	590	5211	531	4668	512	5162	5211	534	51	30	4722	4960	4966	830	240	5162	350	280	590	250	4722	5120	4150	5143	565	4530	3440	4540	920	531	240	100	590	970	5110	4151	40	983	5162	5031	4140	5222	5100	5031	4210	4066	3430	4911	4930
5217	4070	5169	590	531	100	5031	920	3430	350	40	5217	4930	280	590	860	760	3430	71	5034	5012	4350	4010	330	590	4070	5110	250	600	5110	3430	5100	4910	620	512	5134	980	5132	5168	510	4066	4916	4540	5211	5120	3460	5031	5133	4370	52
4666	40	4720	983	4960	4370	512	4668	4622	4066	3440	5221	4730	3022	4913	563	512	5322	240	5152	770	5221	4668	4713	5134	500	280	5211	4720	534	5414	4530	4141	250	4150	5412	982	270	4620	4140	5110	600	340	4916	4964	40	565	5031	5131	600
562	5134	5412	4666	5168	280	3030	4672	600	5016	4660	510	562	330	4668	5110	4960	4140	4540	52	5120	531	4150	3430	4722	4151	4114	280	4260	340	5221	4140	980	5203	4010	601	5200	4070	4340	5222	5222	5414	5120	240	5014	564	4340	562	4070	3030
983	5222	5131	4972	500	5200	280	980	5222	5200	5221	531	5211	4010	100	260	5100	240	4964	4962	564	3420	52	30	4070	330	600	380	4070	5222	4964	564	5164	4066	4260	3430	5412	51	71	5143	4713	4070	4720	650	4622	4370	380	4151	40	3008
5215	4964	920	40	5412	5221	40	4012	5412	510	5200	4110	5166	860	565	4114	5211	3015	4721	4070	983	500	4917	5133	4066	5133	51	4370	620	4540	4720	4722	5211	4115	4540	5169	5133	983	5110	5221	3430	5222	4666	5162	5414	650	3430	920	561	5120
980	980	5221	250	4962	5016	4964	4621	4666	4370	4144	970	600	500	4720	4666	3030	565	4130	5221	5133	3440	512	590	3430	40	100	5221	565	5133	565	4340	4540	5031	620	100	5162	4144	4066	4350	920	5133	250	601	380	350	5132	5110	4114	5143
760	5211	4540	5203	4066	3440	5221	4151	4070	4666	5164	512	4662	260	5332	3460	4151	4070	4150	565	4110	5133	4966	5412	40	5169	4340	565	380	4114	40	3430	4146	4960	3030	600	4070	4668	4660	830	830	590	5332	510	563	5034	830	4370	512	4210
5031	4720	4612	5211	30	4130	4114	280	4730	5131	5131	5010	5215	30	531	5215	5410	4730	40	4510	4930	4370	4530	5221	3460	980	40	4730	563	650	100	30	270	4920	4140	5322	5150	10	5134	240	380	5033	4960	5414	4720	980	4720	5033	380	4110
4066	5110	280	534	5221	51	5222	4918	564	983	590	280	5110	4722	5031	3430	565	5110	534	4540	3060	565	970	3460	5120	3022	5412	4964	4340	260	500	512	500	5162	4914	531	5222	5169	980	5110	4960	5412	5414	5166	5332	970	5332	3440	100	970
4370	4917	4066	4140	5222	5215	563	4310	4510	4130	983	4660	531	970	40	52	4540	5221	5412	3022	5410	5412	5217	500	5332	920	983	30	5031	4964	5133	5414	4340	380	5202	4622	3430	5031	30	5031	760	4668	3430	4510	4140	4720	4540	350	350	5132
4930	5414	5134	3050	5110	4668	240	5132	980	330	564	4930	564	5340	5110	350	5322	4962	4066	5134	4144	5120	3030	4210	4666	5132	5120	4510	4350	4668	3440	983	5169	565	500	510	4930	980	830	350	5134	71	5033	280	5033	4146	5164	4540	4713	4530
520	380	330	5031	4540	980	565	5110	565	100	4070	100	4964	4930	4140	4140	4066	4540	920	600	310	4340	4540	565	4340	5166	564	4540	650	561	5100	190	4114	531	4110	565	510	3430	4964	3030	40	260	380	980	4962	5031	562	4666	4140	350
4962	5332	760	5143	4350	250	590	590	563	4140	980	620	4530	4917	5222	5205	4666	5412	5200	5202	5412	260	30	5100	51	590	500	5120	5134	3430	4621	5322	4966	240	4066	4260	4668	4141	565	190	4540	5014	510	4622	4520	4150	5033	71	920	4962
4966	5169	5200	561	5332	52	5110	140	4918	4530	3060	600	5200	4114	3430	5131	562	280	4140	100	860	5332	3008	5134	3440	4621	3060	4720	4964	5169	5332	3060	51	4612	600	4720	4260	4962	4960	380	4370	3440	4140	5168	5100	4330	4510	5332	4727	5221
280	5100	5100	4151	4510	3050	3430	4370	4964	980	4110	4630	4150	601	4621	534	4964	4668	5332	3430	4723	5033	5410	563	5221	5162	512	590	3440	40	5134	500	3060	561	5100	4614	240	4530	590	562	5332	512	4151	590	3430	601	5133	3018	531	4964
5016	4713	4510	280	40	380	4622	5133	340	5164	510	5202	380	650	4370	564	380	5031	3430	280	5222	3015	650	561	982	5100	5200	563	4140	4720	5143	5205	4962	500	330	40	4911	240	4614	4720	3420	601	240	5132	3030	4666	4964	380	982	30
531	4370	5132	4964	830	5100	4350	4070	5031	4722	4666	330	4913	4380	380	1100	5010	30	4370	5010	4668	40	380	5031	601	4114	4966	4966	4917	565	5031	5016	5133	5322	4146	5031	4210	3460	250	982	4916	4964	562	4066	562	4510	510	4720	4066	565
5166	565	5133	520	51	520	5014	531	4917	4070	310	52	620	5221	5033	5016	3460	5414	5031	4150	5131	4260	4140	3420	4720	4720	4066	5031	4730	5033	4622	590	1100	5332	4966	563	565	4720	4370	5133	4720	140	4964	4540	565	3420	250	500	5221	4966
4151	5200	4070	5010	5100	590	4150	4146	100	4962	4114	4530	650	5202	4964	4130	5133	4966	531	4964	4972	4140	590	4510	5033	4713	5414	4140	561	4370	561	4723	590	4370	5134	5222	5032	4960	5133	5033	4964	4720	5412	5110	340	5203	4370	4964	5010	380
4620	650	4330	5221	5164	770	4540	4066	562	5215	280	30	4114	190	4666	5340	531	500	4720	5222	3410	340	4978	350	4622	350	4918	4910	5162	4510	5110	4070	531	5033	5031	590	5340	564	310	4540	5033	4370	4621	4964	760	5222	4622	5414	590	5222
5410	4672	4964	5200	4720	4066	5120	5222	71	590	350	4920	4110	565	250	4144	4660	4151	5100	4917	5168	650	480	5162	5166	3430	4910	5412	5033	5031	4350	5211	5322	5120	4666	250	4370	1100	4910	4730	531	565	4620	5221	4370	563	3420	4622	4350	590
4130	5120	531	3010	4370	4070	5033	4720	5332	4144	330	565	30	920	260	5164	3430	5332	4668	5200	4962	5168	830	250	5162	4666	5416	5332	531	250	4960	5162	4110	4720	4630	4370	51	250	3030	4964	500	5031	534	4966	3022	4960	5014	4723	3440	5134
71	4260	350	982	4340	5164	4720	4540	4370	270	4120	5340	4810	5168	561	4962	5222	4260	4510	4722	4913	4720	510	40	5200	30	770	4917	5332	5332	4010	510	770	5134	30	4520	514	4978	520	4622	190	5332	5034	4150	5412	4310	3030	4140	564	4540
4260	5012	250	3420	4918	1100	4621	5410	4966	564	600	4260	310	4140	4973	4730	3040	561	5132	512	4730	71	5152	5032	380	5322	590	564	4370	100	4913	565	5222	340	5412	5221	5203	4540	920	531	5120	250	565	565	240	531	564	4146	4530	4146
510	3430	3440	3022	5033	4666	380	3030	4722	5031	380	4966	240	512	5162	5031	5166	4622	5033	5120	350	4960	5100	5332	565	3015	1100	500	71	4350	5033	5222	4723	260	5410	4918	3420	5414	3430	760	4114	531	4973	5202	4973	4668	4666	4960	520	4622
5221	5221	5166	5016	4713	4140	4973	4960	40	4141	4668	980	510	4913	71	270	5221	531	500	5169	4660	380	3460	4260	340	512	4144	3030	4960	5410	71	270	3460	4964	3018	920	5164	4130	4380	561	565	4210	4917	4530	5132	380	4723	5034	5032	4115
380	5031	71	51	250	5162	5332	40	4972	5166	5222	4060	3410	5410	5414	500	4910	982	4672	4910	5152	760	563	380	260	5332	601	531	5110	5120	3030	310	3018	4810	4730	5133	4910	590	4720	3420	4913	5410	4310	4070	100	3008	5412	4630	4141	71
3410	5410	590	4720	565	480	4370	5221	4721	4918	601	4964	480	4916	330	4722	250	4910	601	4620	590	4913	4520	5120	4370	51	190	4530	4721	4960	3460	5110	4713	5200	650	5162	190	3060	982	5100	3030	5110	4730	4114	4510	5120	4621	4620	4917	564
3440	4510	5110	5120	5414	4910	260	4210	4340	1100	4530	3440	4720	5164	601	5211	770	4621	2010	4720	760	4730	4146	4720	4960	531	5222	982	3430	5162	5162	4144	190	4530	5034	5332	5410	4918	3060	260	5410	40	5416	4917	4668	4540	563	5410	4720	920
4622	5033	5033	4540	4917	4540	534	4974	380	4150	260	5203	5412	4540	5132	510	4146	4370	4913	4913	330	3022	770	340	5132	4540	4146	562	4973	4713	534	531	4666	40	4920	4540	40	4110	40	4960	4620	500	5100	30	71	5221	4940	30	5332	4070
5162	563	601	3460	4520	4210	4614	620	512	480	565	4917	5133	4141	4962	760	4720	4960	4973	380	3040	100	5340	5033	920	4140	4720	5033	4913	3420	563	4720	5031	4650	4060	5033	3015	5202	5033	3410	4973	5120	260	4713	4972	3022	5410	4260	4144	4978
5414	4973	5332	4660	3015	4710	531	5414	4961	520	4066	534	512	4660	240	4070	5110	5033	4330	5412	4622	5162	4260	4917	4540	5033	5205	3008	350	5414	4973	514	4720	4668	52	5143	270	4612	500	100	4668	510	71	4140	250	5412	4973	4340	5133	5016
4916	330	4722	5133	5162	4120	500	565	4720	380	4920	5164	563	4210	4722	770	71	4964	5410	350	5130	4962	1100	650	5110	270	5166	510	830	4210	4713	100	5120	4973	260	5164	4130	4660	5410	4270	4723	4917	760	4720	4913	5134	4210	4913	260	770
230	4150	510	5412	380	4141	4916	5166	920	5010	4115	4721	534	4146	340	4260	4144	4720	4960	4622	3440	4630	5130	51	250	4728	5143	4913	250	600	4962	5332	512	5412	4660	5132	4140	770	4151	5332	601	4110	30	5332	5410	561	71	563	1100	5322
4668	240	5414	3430	561	561	5169	5412	4973	4668	5169	71	280	4713	4917	3040	4623	5169	5143	30	4370	4973	5034	4370	4723	4918	4666	5143	5412	4917	4918	5152	3030	5410	5340	3060	5031	5168	380	4370	770	3420	601	531	4614	4340	5414	250	270	531
5322	4210	260	4370	240	4530	4730	5033	30	4662	4140	4540	260	4650	4614	512	3022	5133	4723	4966	601	4672	4964	4540	4721	4962	5332	4973	4668	4260	4730	4672	5110	4120	4622	4721	140	310	5031	4130	561	4660	4913	4723	30	5332	4960	4916	5033	480
500	3420	4260	500	4146	5031	970	4964	5166	770	5211	5120	565	4920	4713	5012	4350	270	5134	601	830	250	531	100	100	4115	5031	330	3030	380	620	4713	982	4723	3420	5200	5202	190	5332	71	3022	4722	4713	5033	4151	3440	5162	760	330	3410
4540	4114	4370	5332	4973	4115	4710	71	5033	4960	531	4150	4622	5132	5166	980	40	5143	5162	4380	531	564	4630	830	4260	4370	4730	4723	4713	5132	5120	5031	4066	601	563	380	2010	4713	4723	534	100	3030	5410	4726	600	5010	30	5134	4722	5100
5164	5168	650	600	260	4144	510	4961	3420	5012	561	4962	5169	4964	4530	4621	5143	100	982	5100	5031	4940	3410	4668	4668	4350	4540	4660	5120	4621	520	4962	4144	4710	1100	340	590	5133	4973	5010	4722	4630	4916	3018	4330	260	4713	4940	5203	4510
650	5340	982	4920	4330	4728	4390	260	4960	512	760	520	5222	71	5410	380	500	920	4520	4630	3460	3030	5010	4973	4662	5410	4960	5410	5322	4620	4920	5164	380	4340	561	4917	4972	5322	512	4973	620	4973	4614	4370	4960	4911	330	510	4672	4520
5332	4960	380	5033	4940	5211	4917	500	240	3460	4910	4380	4140	52	4916	601	5414	512	4660	5110	5110	4713	3013	5410	330	4672	4920	240	562	4973	5410	1100	250	4940	920	4723	4964	5016	4622	4623	4917	5162	4612	5340	4713	600	512	4713	4115	3022
5133	5143	4973	4710	4660	601	3460	4622	250	5211	5162	561	3440	4978	4910	4723	5031	4530	100	71	4623	240	4722	4966	5169	4973	250	2010	5410	4913	3420	380	3440	270	531	4660	4962	5012	5412	4940	563	5143	5143	4380	4340	5340	100	5010	5014	4668
4150	5010	563	4917	4721	330	350	4260	4713	3018	770	260	5332	3018	5100	100	4370	250	4666	5211	190	4115	5134	260	4940	100	563	760	5143	240	5412	5168	5332	4140	4917	5410	4713	4966	4710	4260	4330	4330	4723	5416	4940	520	4913	260	760	140
5033	4723	4151	4966	5143	4151	760	5332	5162	561	3420	4623	5010	5211	4260	3440	5332	4660	600	650	4917	4620	562	4960	4973	4960	4660	5168	240	5034	260	4540	4911	3022	4340	4630	561	5110	4972	51	240	4940	4940	5412	4530	5133	770	4973	4964	4144
5143	4540	51	4130	4114	5414	5412	4973	5203	30	4540	3030	4966	380	350	5166	4010	4973	260	4210	561	563	4114	4913	4962	480	5033	4010	5132	4730	4916	5410	240	71	565	4973	71	920	480	270	4260	4960	4672	600	4260	5169	3015	5120	5168	4913
4978	982	480	100	4913	3430	4913	4913	260	4612	4623	4146	4151	620	510	4910	5033	5200	760	4612	4672	5205	3022	4920	4918	4520	4141	830	982	770	4668	250	4960	5414	4114	51	380	3018	5143	563	4940	4920	4012	4110	561	4920	4917	240	4668	4720
5034	4978	4662	30	4744	4145	4620	5143	4940	3410	4612	4140	5031	4623	4660	2010	4330	5100	30	4146	5100	5143	4910	600	4730	4660	4140	4330	30	4666	5132	4614	310	4910	4930	514	4720	5222	620	5410	5414	5132	4972	310	4672	4723	5120	340	240	760
3050	30	500	650	4730	3022	4723	330	5410	650	5110	650	5168	4520	5143	4720	3008	4917	250	5016	4540	5410	4666	760	240	4120	531	4668	5164	330	4614	4918	4350	5100	4510	760	4917	4622	4940	601	5162	4621	5162	380	5164	3010	5143	4730	500	4370
4672	5132	5410	4723	650	5010	4660	250	5100	4713	5016	920	5033	5100	4520	830	5012	4940	510	760	4916	601	4916	4721	5414	650	5034	71	4940	4918	5164	4913	565	830	71	5100	500	5211	4713	5164	330	4730	3022	5143	5143	4622	4150	561	4730	4270
100	4340	4520	5162	5120	270	4977	4610	5416	3050	4150	590	4722	520	4940	4540	4114	4913	830	3440	3030	4920	564	534	4972	250	4614	4260	601	5143	3060	5033	5034	4660	4530	4620	5033	330	5100	4151	534	760	100	4660	4723	3060	4620	5412	4916	4140
4728	250	4910	4728	5014	563	4668	3420	4810	4720	534	5211	3030	5110	4730	590	4723	4666	4713	5410	280	5164	140	3022	830	510	4973	5162	3420	140	5034	4370	5414	4114	3015	561	5416	510	190	4713	564	4520	4260	5012	4810	5033	920	3320	5143	4612
4964	4530	5016	4973	340	4722	4340	4150	5322	982	5100	4910	4917	5412	5322	140	4390	4520	4620	4520	4114	512	920	5016	4660	4622	4370	260	4916	4151	240	5133	5416	5340	3440	240	260	5033	561	4510	5100	30	561	5014	4916	310	760	5143	5120	500
5168	4940	4917	4713	4916	5012	4940	4730	5146	3022	5340	380	5134	4666	5032	600	4140	5152	480	5332	5414	4510	4070	4151	4916	5012	3440	5414	100	4966	330	4940	5033	4913	5010	500	512	512	5130	5412	4962	5100	5152	5032	5134	562	240	4917	5410	260
4723	350	4666	230	920	5203	4918	601	270	5014	5033	5410	4310	4340	563	4350	600	4210	4260	4130	4350	620	5202	4940	563	561	4210	5010	260	601	340	563	4370	4012	534	4962	5205	5332	563	512	5143	982	770	562	4623	4110	4730	601	601	3013
5146	5014	4668	5034	4150	5168	5410	5146	330	500	982	40	4973	4530	4151	4917	4962	4713	340	4978	650	4723	5412	5130	4917	4913	4913	5146	760	3460	4940	982	3420	30	4520	3420	250	4370	4966	5120	4623	563	4668	5410	270	4660	4660	4722	4973	4972
564	4730	5032	5410	5132	5152	561	982	5414	4723	5332	5014	4620	3010	5120	190	4722	5120	563	4370	5332	4916	5416	982	5410	5414	565	480	4920	4630	4723	5120	4973	920	3022	5205	600	5100	260	5134	5132	5034	4910	270	4917	190	4920	5132	514	5014
310	270	4672	4810	5410	4918	100	534	4672	250	500	4972	5146	4260	5134	310	4614	600	561	5033	5169	30	4141	5169	760	563	760	4916	480	620	4260	4130	5205	770	5169	512	534	4115	4920	4913	512	561	600	4973	5012	4917	5134	830	5340	5332
5120	510	4913	563	982	4911	340	4917	650	4710	563	4666	4370	5203	600	5332	4270	5410	4940	970	4720	4917	40	4916	4713	5202	3040	5012	510	4390	4961	4973	4260	510	310	5120	4672	4672	4260	4917	4210	4721	480	4623	920	4964	4623	4962	4960	340
4710	4012	240	830	3420	4720	5143	4520	4260	4660	4380	5033	5164	5414	4510	4668	4530	340	4917	514	565	5416	620	4723	4913	260	4713	4725	5032	4940	4530	350	5143	4713	380	4530	770	4260	4621	4612	51	5134	830	71	534	4722	4916	270	4918	3440
4510	601	4660	5130	563	4920	3008	512	5130	4540	140	5414	4260	4612	3420	561	4622	760	3022	520	4973	4660	270	4730	510	5152	3030	4940	5010	830	601	620	4520	5143	51	4730	5120	4151	5162	650	3460	564	920	4810	4721	4972	5010	4623	770	4917
534	260	4940	480	4723	4660	4510	4713	4660	5340	5410	5412	561	140	4918	5221	4978	620	512	4660	30	561	4621	5132	4130	601	5410	4713	4961	4520	4917	4966	563	4730	4972	4916	5332	380	4978	4723	4660	4012	4622	563	4146	4973	5012	5014	30	561
4210	4916	30	260	330	531	71	510	4512	534	4973	3018	4512	4630	5340	4120	4973	4130	4916	5132	4612	4710	4960	4962	4621	4940	5133	4012	4723	760	4660	770	3040	4917	5414	4913	4380	5014	4130	4114	5202	4670	4146	330	512	250	4012	190	5162	5202
770	3050	4978	601	4966	5133	30	190	4114	4210	4730	190	5322	5010	51	565	5120	260	5120	4723	340	5414	5143	5166	270	4916	4620	920	4666	982	51	601	4913	4623	480	4666	5143	4140	4916	4966	480	4260	5134	4666	4911	830	4910	4668	563	5152
512	1100	512	4730	4620	5416	601	830	4962	5205	4370	4978	71	5033	270	5014	4728	563	620	3420	51	4614	5169	510	4724	4530	4722	601	4510	510	3015	4721	330	760	4380	4144	4621	500	4672	4916	4340	3008	270	4390	5202	4730	5032	512	4940	4916
260	4913	561	4510	5032	4662	4966	563	350	4728	4713	4510	5414	5332	4920	520	4713	4728	4151	4721	5033	534	4142	140	650	4710	4350	5322	4151	4723	4911	5166	920	350	4612	5414	4973	830	4917	4920	4920	330	4340	561	5200	4940	340	5032	340	4960
4940	561	4916	4940	100	5332	4260	4972	760	5100	4210	5168	270	4020	4727	4012	4972	4614	4730	4260	5205	4012	5168	5164	561	190	5164	4810	330	4144	510	561	4140	5168	562	4713	4940	4066	4913	3010	4730	4713	310	5120	4012	4966	534	5162	5414	5033
3022	4520	3008	4260	600	4970	4911	4510	3410	5033	270	5332	250	3013	534	5133	4730	5162	4911	5014	100	4666	4144	4340	600	5120	5169	650	3410	563	4612	260	5410	100	590	830	4913	4977	4962	5132	140	4141	512	620	4730	5410	4146	4510	5100	4977
4973	600	4920	4913	760	5202	830	760	51	5133	5152	4612	4713	4672	760	4727	4260	4916	4728	4713	140	5134	601	601	620	4977	982	3420	4012	4916	650	5143	561	4978	3013	3022	100	982	760	4972	4972	5130	120	5322	5010	5143	561	4662	51	830
830	534	5162	4145	5150	5032	120	5014	4150	4974	5031	4145	330	3420	4723	4970	4710	4721	4966	500	3430	830	4130	4672	5032	982	4612	340	4672	4340	760	920	4730	4260	140	270	4722	5205	140	4012	4961	4723	5132	51	51	920	982	4115	4721	563
4020	140	5120	514	770	310	4961	4670	5143	4730	4720	4370	4614	590	4966	620	4940	4144	3410	4973	514	5150	565	4620	120	830	4330	4722	512	5322	350	4916	260	4721	190	4940	30	565	120	4660	4614	4340	4510	4260	4660	620	514	4660	3420	5150
563	5166	4713	4114	512	564	4713	30	4668	4910	3040	4520	5410	4060	4961	4728	4917	5164	4622	5203	4713	5166	3440	4144	4210	4917	270	350	770	4623	830	340	4630	4210	4370	5032	4810	4210	4810	5014	4672	5152	330	4730	5162	4977	4530	4672	5016	5164
4913	51	4966	4330	4666	3040	5134	4940	830	5332	5414	480	5205	40	4340	4210	260	5012	4210	5416	230	4151	4662	5010	4114	760	350	51	4660	4920	4672	4960	4620	4130	564	4114	4920	561	350	4918	4520	514	4962	830	830	5162	5166	4727	4660	5412
5132	5146	4911	5322	5166	5033	4130	5150	4913	4621	4672	601	4723	3030	4672	5322	4620	4340	4340	260	5014	4668	4622	4350	512	4144	4260	4666	4620	512	5032	3460	4612	480	5143	330	920	514	4144	5150	5322	620	5032	4940	330	4810	4151	51	4913	5012
5032	4721	4977	4662	5134	4520	5340	4660	4710	3430	1100	4913	4672	510	512	4146	650	830	5032	4920	1100	600	51	4972	4672	4260	561	3022	5014	4672	982	3040	4918	512	4978	4672	4721	5152	270	620	350	830	4210	340	4666	4721	4962	4621	4666	4666
5412	4151	340	5414	4920	4973	650	4722	4920	5416	5034	3320	4020	4370	4721	5033	4726	4972	5164	4060	4918	4520	4380	5143	4670	4723	4151	4623	5416	4660	5168	650	4916	4724	3008	3460	5322	4670	340	330	270	5150	4722	4727	650	4913	5168	600	600	510
4614	4668	4144	512	5416	4713	5100	340	4623	3440	4913	3022	5100	270	4620	5410	601	4723	5012	4115	4911	982	4210	4977	4020	340	4940	5032	4623	4130	5200	4612	4917	4310	520	4012	5100	4722	4668	4961	4151	5169	350	4722	4966	4978	600	3022	4145	4973
514	760	830	4012	510	4730	4672	650	4723	760	512	4720	4916	4960	620	5120	534	4115	4614	4650	4360	4621	340	270	4012	5200	260	4961	51	270	4012	4660	510	4510	760	650	4660	4913	5034	5414	4966	4976	4130	920	564	5012	4710	564	4151	4940
340	4614	4710	5416	4672	4723	5164	4114	4662	4120	4917	350	350	3050	4911	4150	561	330	4623	770	4140	270	4713	4961	4620	600	4721	4151	120	4961	4340	4260	4940	600	3050	4966	760	531	770	4520	120	4966	51	4340	5166	71	4614	5416	4012	5110
4713	4660	4974	4916	4961	5205	770	5152	620	310	5120	4974	830	350	4623	5168	4916	5032	4722	564	5032	190	4060	5322	4920	3060	4917	561	4614	4726	4722	4710	4120	5032	4910	620	5132	4350	5164	4672	4012	4510	4660	4913	5034	4713	120	3420	5322	4713
4917	512	270	4520	4622	4962	4623	561	4151	4973	4962	4350	5143	4720	4972	5100	350	4961	4630	5414	260	4918	260	4660	5340	4920	340	770	4130	51	5310	4730	4330	4672	4974	4150	4710	350	5032	5034	5032	4962	140	5150	4920	4145	4672	5168	830	5200
4512	5150	5143	760	620	4917	51	5120	561	4115	100	340	3050	561	4012	4623	4668	4623	5203	4911	4012	5032	4918	4330	5322	4623	4916	4620	5150	4330	5014	4917	514	4966	4964	4151	330	4916	4662	4146	5166	4390	982	5205	4620	5414	5322	120	4966	4010
4012	4722	4723	340	4210	260	5322	5010	4530	920	4520	3015	4940	1100	120	3050	330	4620	5130	4728	4940	350	4962	4380	4910	5143	4668	3060	4114	5032	4623	5012	4672	650	4210	4961	4144	4730	100	5032	4726	350	620	5134	510	512	4972	534	4260	5146
4380	100	620	4621	4623	920	5132	4962	4012	531	4260	5110	340	4730	5168	4145	5014	4920	4012	5340	4630	5130	5414	4710	4350	5032	4672	5130	4962	5202	5322	4012	5100	4620	5130	480	4916	4120	510	4710	5130	4270	4721	4145	5130	4614	4961	4012	5164	601
5100	5322	5340	5032	4614	30	4012	564	5340	4151	4960	4973	4660	5120	650	330	4210	4710	4310	4940	4260	4724	4977	512	4530	620	830	4920	5168	5340	4966	5203	620	4151	4614	5168	4614	5143	650	4115	5340	4961	5010	4012	3420	510	4110	4910	4728	5340
5134	4670	4614	4115	120	5410	5416	5168	5032	4672	4940	562	3420	3320	4150	4973	4920	4012	5144	620	3018	330	3060	4621	4520	5146	4110	4721	4621	4910	4620	760	4660	4520	5033	4623	4622	4710	3022	4911	4666	4623	4961	4668	4270	4260	650	5340	4340	5010
3420	4966	5416	5012	4911	650	600	5134	770	4012	3022	140	5162	531	982	480	3010	4672	4920	4390	4722	4150	534	480	4911	5164	4723	4114	270	4012	5416	830	830	4961	4722	350	4730	4012	3420	340	4978	4672	5012	4728	190	5164	4662	4920	5130	5169
4730	5032	4961	5169	5340	340	4520	4920	5150	563	5416	4114	4623	5014	4710	4672	340	510	3420	4140	4666	514	5033	5146	350	4910	3420	4150	4972	4270	5340	4520	4012	5132	4621	982	564	5120	4012	4978	4911	4911	4623	512	120	3040	5416	5322	4621	5410
4918	4662	564	3060	5146	4012	4666	4966	982	514	4916	5100	760	4977	4210	250	5164	3420	51	4916	270	120	5332	1100	770	1100	5168	4672	4520	4662	4520	5416	5168	4614	4977	5166	5034	260	4730	5012	4622	5200	3420	4724	4710	230	4966	620	620	3010
51	4961	4620	4623	4151	4150	4146	51	190	5410	4911	500	3060	600	5416	5414	4672	5340	5152	4144	4960	5014	561	5202	4961	4668	4911	310	5146	5164	4972	4668	340	330	3040	5014	5014	4973	4612	4962	2010	4910	4920	4972	5032	5152	4520	514	4723	4730
620	770	3060	620	4726	230	564	5032	5134	5203	340	5143	5416	4973	4630	4940	4966	650	4530	340	4115	5169	5150	5203	5144	4150	920	4380	5144	5130	4710	4810	4726	5130	340	4210	4520	5410	330	5416	5169	5164	4520	4310	4961	4012	620	4961	4961	4340
4340	4920	4623	920	4724	760	4722	4650	510	4916	4614	3010	4666	5134	4114	5032	5130	5168	5010	561	3022	4972	4623	4614	4966	4012	3460	4340	4911	4115	4666	4666	5032	120	40	120	3018	4270	4210	4977	5416	4727	564	4961	140	340	4670	5202	5166	4141
4660	830	4130	4672	5130	4916	3022	3022	5200	5152	5143	3410	4920	830	5014	3022	5032	5203	5150	3015	5143	4961	3018	4623	4614	4730	5012	4630	4670	4622	480	5130	5012	4962	230	4911	4728	760	4666	4210	650	5010	5130	4614	5322	5100	5150	5150	140	4722
4972	4728	5014	4350	270	4940	4920	5012	4620	260	4010	4340	5130	4360	5144	4966	5150	5416	270	270	3420	770	4720	770	3420	514	4710	4614	4966	4710	5152	3015	650	4621	4330	770	4918	4721	5416	4721	4977	4666	5322	4620	982	4916	4350	4614	4622	4621
982	4972	120	564	5034	4146	4662	600	514	5414	4630	3460	4012	4723	5130	4620	4012	5016	4918	190	4978	4966	500	4722	4390	770	4962	5152	4727	4612	4146	4620	760	4977	3320	5416	340	563	4918	5168	982	5032	4911	4920	620	5168	5130	982	310	5205
600	4911	4976	5132	350	4142	5032	4727	120	4260	4146	4713	4670	5032	5200	5152	4961	4120	4020	5143	4728	5034	4973	4012	5014	5014	5340	4911	4910	4721	4150	3410	4961	5150	5012	4662	5169	4723	4961	4666	4621	120	5014	4910	2010	4672	4911	4911	4623	5414
4920	4130	3420	4620	3060	5166	270	5310	4130	4727	830	4210	770	5143	5150	4713	4340	4110	5340	5168	563	3008	4370	520	3060	4961	4961	4350	4662	5014	120	5032	5014	190	5332	564	5134	4917	4977	4614	5164	4972	4350	760	350	760	4010	5200	4962	4723
4623	5416	4350	5014	4670	4260	480	350	5010	5120	120	4614	982	480	140	920	620	5130	5169	4730	5322	4910	5110	620	5150	4614	330	5416	5130	5416	4210	120	4622	3420	270	5130	4150	3008	51	3022	5168	770	5150	350	5416	4724	270	4520	4978	5168
4722	120	5010	4668	5152	600	4310	4666	5164	340	5014	760	4210	4510	5152	340	5416	4150	5014	4960	920	5200	71	5340	5416	564	5032	620	4728	5150	270	330	4920	4728	4720	5150	4620	4620	4520	120	5150	480	514	564	3060	140	4115	4972	3010	534
4810	4390	770	4340	5310	4622	4910	5144	3022	4917	3320	5150	140	3008	564	4612	3420	120	4961	140	4020	4662	4660	5144	4623	4340	4012	5340	5200	4962	4151	4920	350	982	5110	5010	3022	4940	3460	4512	510	3050	3460	120	4662	4961	5152	4141	650	4260
920	4918	4622	4961	514	5034	520	4340	4520	5168	4710	830	4961	4940	4612	4913	3320	4662	770	4012	3008	5310	4512	4622	4710	5168	4623	4210	5340	120	4512	4978	4270	5416	5120	4972	4120	5164	4623	4620	5014	5310	5164	4672	5146	770	4722	4114	4910	4911
4662	4350	5150	4918	3460	5143	4612	4620	4911	3015	4340	4940	4144	5016	770	3410	4612	5144	120	4340	5016	4911	760	4662	4115	4110	4520	4612	4210	4911	770	4622	5166	5166	4514	5203	520	4146	5152	5205	4910	4130	4530	4662	4910	120	4977	4670	4614	5130
4977	4620	4210	5150	5012	5146	5010	4623	4744	4940	4961	4960	5012	562	4728	4360	120	534	4380	4110	982	4210	5132	2010	4010	4010	5130	4972	3060	190	5166	4623	120	520	4721	4920	4723	340	534	4662	5144	4662	3018	4520	5144	4910	51	770	4620	4623
5152	5130	4972	2010	4662	5120	5200	4630	4115	3040	5130	4144	4612	310	4662	4115	230	770	4962	51	4920	4114	4012	5012	5168	520	5014	514	4710	5144	5150	5034	5130	534	5016	4722	5152	140	5169	770	4150	4614	5340	3420	4621	1100	4728	5166	4210	4614
5130	3060	4621	4614	4972	5322	5150	4614	480	5143	4970	4670	5014	4721	3460	3018	4520	310	5416	4350	4340	51	4723	4390	4728	4620	650	520	514	4975	4728	4911	5010	5205	4360	5144	4350	5130	5200	4722	5203	3015	5144	4350	520	4623	5310	4710	534	4660
3460	5205	4670	5164	564	982	4110	4662	4621	4913	5150	770	4520	4710	4670	982	4974	4612	4662	3013	4210	4721	4620	4728	4612	4721	4974	4962	4150	4614	4270	4151	4151	4350	5164	4744	4726	4920	4020	4340	4721	51	4662	5034	770	4710	5200	5130	4520	4350
5012	4270	5310	4724	4722	5014	5168	770	4910	4970	5032	4672	4976	4145	514	650	4721	480	514	4623	5164	4974	5012	4115	4151	4662	620	5150	564	5168	4114	4210	140	514	4512	4621	4114	4520	5150	5200	4710	5168	4330	5169	3460	5146	480	4721	4110	51
480	5144	4962	4612	4142	4623	5310	5416	5168	4670	5146	4730	5034	4514	4350	4614	3050	4141	5310	3060	4966	4530	514	120	5130	4966	4977	3320	5152	5166	4910	5150	4623	5152	510	4910	4966	5416	4350	4530	1100	4650	4966	4010	5168	534	350	4350	4150	4012
5203	620	5152	5146	4910	4913	4210	5169	4614	140	4662	4916	4630	760	5310	4622	4380	4380	4612	920	4614	4330	4510	5416	480	3420	5322	4146	4512	4020	5169	4142	4621	4972	4973	4612	830	534	4728	4910	4662	4728	230	3008	3410	4010	4130	5144	4920	3420
4520	4710	5130	5166	4727	3410	4972	5340	5014	4520	650	4723	3013	4972	4726	4020	4512	5014	5034	4614	4810	4978	4727	4911	4144	4911	4972	120	4918	4724	4662	4621	4710	4911	4350	4350	4727	5340	4721	564	5152	5012	5168	4962	5150	4962	3060	480	4977	4721
5340	3022	140	140	140	3460	5130	5130	4727	5146	4012	1100	4710	5169	5012	5416	4621	520	4972	4977	4961	5340	5016	4520	5310	5340	140	5014	5012	4972	5010	4662	5016	4722	4662	5340	4012	650	4911	4970	514	970	5200	982	5340	4630	5144	5205	5416	120
5150	4144	4150	4020	5144	620	4962	4612	4670	4966	4130	4621	514	4614	5169	4660	270	4330	4350	5130	970	4380	4940	5168	5034	140	5152	5200	4612	2010	5130	4728	480	5014	4962	4728	4623	3420	5014	5130	4350	5416	4115	534	4976	5032	4612	3060	480	230
5200	4962	534	4722	4621	830	4724	4020	4380	4622	4966	270	3008	4728	3060	4972	520	4670	564	480	4721	5144	4976	4910	5152	4130	480	4662	190	350	4142	140	5150	4150	4672	4710	4510	5032	5340	5340	310	4620	4710	5130	4722	5130	4145	4650	120	5032
4911	4621	4728	120	4710	3060	5144	4911	5152	4350	4728	4650	5032	4350	4744	4010	564	5150	4710	5164	4330	4728	4730	5014	5205	4972	534	140	2010	5310	564	4972	5340	4662	4623	3015	120	4728	4722	5152	5146	5144	4114	4270	4115	5202	5340	5012	5150	3320
5416	5310	4115	4622	4512	4340	4727	5164	3460	5032	620	4620	3018	770	4975	5143	4662	2010	4390	5032	4620	5146	4920	5152	4110	5150	4662	4621	4744	4728	4725	4390	5144	4974	982	4727	480	4614	5166	4621	4728	270	5169	4911	514	4620	5034	4150	4726	620
3060	4910	4530	4721	4145	4350	3040	4710	5310	4920	5168	5132	4350	4620	4977	4916	480	4145	4621	4666	5416	4512	4972	5150	564	5130	5144	4728	4977	564	5146	4350	4614	5169	4141	5012	620	4623	5144	5144	4724	4114	5310	770	4727	4520	4114	4728	4710	5416
4961	4512	5322	5205	5322	4966	4670	3018	4610	5322	4972	5016	5144	4962	4115	4151	5168	3060	4114	5150	4270	4622	4614	514	4744	4722	3320	4978	140	3060	3050	4961	5152	564	4940	520	3040	4972	4114	4728	5310	4020	4744	4210	4728	5416	190	4918	3060	4060
120	564	5144	5340	3410	5144	4978	270	5144	4390	4330	5416	4972	340	4724	4380	140	3320	5168	3010	4520	5012	4672	4975	4978	534	120	5169	5310	4150	3022	4670	4722	5144	4713	5152	4961	230	5203	5310	5012	4350	4978	5144	5152	4512	4744	4010	5152	4961
4146	4744	4721	270	4728	5130	5016	480	4350	4911	4724	5012	4010	563	5010	5202	4911	4918	4910	4725	120	480	4721	4114	4726	5416	4726	534	4978	4530	4115	4110	4210	4744	4916	5202	3410	5144	4150	4975	5010	520	4977	5164	4114	270	4726	5310	4380	4920
270	5152	4975	4530	480	4672	140	4910	4728	4724	4726	4961	4911	5130	480	4920	5152	1100	140	830	534	3060	4728	5310	514	120	4728	5203	4380	5012	140	5310	534	4975	3460	4512	4530	4961	5012	514	3060	4742	4728	4710	4726	5014	5205	4612	4662	4330
4721	514	5012	5168	5200	4977	5012	4744	5012	4145	4721	4012	5340	4120	4978	4662	4744	3008	230	4972	5144	4612	4710	4918	4150	5144	4670	4710	4115	4977	4721	5014	5203	5310	514	4020	4340	4726	5310	3060	4530	4612	4724	2010	4612	982	4724	5152	3460	4672
4910	4977	3018	4725	4612	4961	230	5034	4975	4721	480	5130	51	4961	4971	4710	5340	4350	520	4142	4974	140	5164	4726	4975	5310	4621	270	5169	514	4744	480	4721	4630	3010	4726	3460	4650	514	4110	4612	4710	4150	4115	4310	4612	3410	140	5012	270
4114	3460	4380	4962	4977	4978	4744	3460	310	830	4270	4360	4728	4080	5146	4530	4630	4911	4141	4672	4727	4727	4810	564	140	4612	5310	5310	4975	480	4978	3022	4662	5012	4650	4670	350	620	5146	480	5034	5340	4145	140	4918	5200	4630	5169	4130	4114
5144	480	4512	4911	5010	4724	4145	4512	5034	3060	4620	4710	120	3060	3320	5150	4110	564	5205	4662	5200	5152	4360	4670	4950	4670	5150	4512	4530	4010	5144	4020	4380	3060	5146	5310	5168	4970	5010	140	4744	4622	3060	230	4724	4120	4270	4724	5144	982
5169	4115	4650	4670	4390	4972	4728	4977	140	5150	4350	4662	5152	51	4512	4918	4150	140	4727	120	5340	5010	4612	4130	4146	3410	4971	4310	4724	4670	4727	4141	5310	4390	4012	140	3008	4971	3320	4724	4670	3410	4975	4612	5310	5016	4725	4744	4972	5144
4350	4612	4726	5152	4530	4620	4530	4742	4726	4330	4722	3050	4610	5150	310	4520	5200	4650	4726	4961	620	1100	3420	4978	5012	5010	4724	4670	5203	5152	310	534	4728	140	4726	4380	5130	4662	4630	4744	3320	3460	4512	4744	4350	4114	5169	5203	4724	4514
140	5016	4630	4120	4975	140	4380	4115	4978	4614	4918	5032	4724	4390	4380	3060	514	5310	4744	982	4141	3018	4961	4810	5146	5016	4150	5144	4630	5200	514	5340	4972	5034	4390	4330	4670	3010	5205	5169	4115	4146	4726	5310	4670	4662	4975	4530	4612	4662
5310	4975	4918	5144	4971	120	4726	4726	4724	4623	5144	5310	4977	534	190	4670	5205	4975	5146	3410	5202	4975	3015	4612	4977	4727	4727	4726	4725	4512	4975	4977	2010	3410	830	190	5310	5010	4330	4650	4727	4726	4725	5146	4744	4727	4512	4726	4270	4130
4726	4380	4724	4910	4270	4721	3060	4724	5169	4380	4744	51	5310	4662	4950	230	4810	5146	4724	5144	4975	4270	982	4512	4610	4724	4115	3050	4971	4744	4726	4727	4744	5010	4020	4115	5144	120	4744	3320	4918	4975	5146	4020	4512	5150	5146	5146	5205	4910
4270	4725	4744	770	970	4310	5146	4110	4612	620	970	120	5150	4621	4270	4911	5144	5010	4810	534	5150	230	5032	3060	5010	4380	4270	4977	4726	5010	5012	5144	564	4726	350	4978	5012	4621	4110	4150	4512	3060	4670	480	4150	480	140	4020	5310	4620
3013	4971	5146	5310	5169	4380	4115	4530	4725	4270	4971	3060	4744	4726	520	5144	4145	4630	190	4918	4662	4726	4911	4971	4650	4390	5016	4744	4974	4310	4950	4146	4971	4060	4620	4725	4310	3040	4725	4976	4725	4115	4270	1100	4380	4350	4380	4975	4670	5310
4612	4724	1100	190	4725	4614	3320	3060	3060	4972	514	4911	4978	4012	4725	4961	4727	4744	4975	4360	5310	520	4340	3050	5203	4971	3018	4975	3008	4380	4971	4270	4975	4918	120	4975	4662	5150	4727	4726	4975	4918	4918	4725	4975	4621	4727	4380	190	4710
4744	4726	3460	4512	2010	5150	4971	5200	4977	120	4512	4810	4115	4911	3410	120	4020	514	4974	4975	520	4110	4020	3410	4725	4145	4010	4115	4330	5203	4110	4726	230	3460	4961	5034	4724	3410	4726	4330	5205	4724	4727	190	4110	514	520	4978	4970	514
4530	4330	5203	3410	4630	4670	4725	4390	4010	4961	5310	5144	4650	4976	5034	4978	3060	3022	4115	5205	4710	4744	5203	4145	5016	4744	3022	4918	4270	4725	4724	4120	4977	3008	4115	4971	4630	4911	3015	4380	4130	4512	4630	5016	4978	51	4142	4330	4744	4728
4724	310	4360	4727	5203	4270	514	4728	2010	3010	4978	4142	3460	5205	4330	5203	4514	4726	4977	5146	480	4971	4610	4530	4512	4330	3050	5034	4010	3022	4977	5200	4727	3320	5205	4270	1100	3022	4270	4974	4270	4744	4010	4621	5169	2010	4918	4130	4650	190
4975	4727	5034	310	4650	3320	4630	5203	4145	4620	5010	4726	970	5416	4650	5130	5016	4390	3060	5012	4621	4977	4115	4725	3022	4726	4744	190	3015	4971	5205	3018	4810	4725	770	4724	4977	4145	4115	5146	4810	4530	190	4360	4977	4650	4971	4270	3050	4512
4670	2010	190	4726	4380	4971	4020	4130	4630	5144	4621	4728	4725	120	3022	3010	4115	4270	4725	4621	4060	4970	3320	4630	4380	4725	5010	4145	4610	4610	4380	4744	4978	4145	4723	4146	4950	480	4724	4670	520	4150	4650	5010	3010	4728	5203	4950	4630	4976
4115	4650	4727	1100	190	514	4742	4971	4971	4142	3008	982	4142	564	4144	4390	310	4974	4670	4744	4970	4670	350	4727	3018	4270	4978	4724	5034	5146	4630	4724	5146	4670	2010	3008	5146	4150	4975	4725	4971	5205	4380	4512	5205	3410	970	4971	3022	3460
4330	4020	4725	4977	4950	4612	5152	4380	4974	4512	4975	4725	4975	982	5205	5034	4977	4977	3460	4710	4726	4725	4726	4724	4330	4978	4725	4020	4020	3410	4130	4970	4670	4950	5416	4950	4512	4727	4971	4610	4020	4142	4142	4971	4130	5144	4950	4977	5034	3060
4970	4010	4270	4744	4978	5340	4330	4975	4120	5130	3050	3013	4621	4725	4130	4270	4975	4724	4512	4514	4971	310	5014	5034	3015	4630	4810	5016	4950	4950	4330	4150	4020	2010	4710	4130	3060	4630	4514	5203	4010	4977	4971	4630	4630	4130	310	4810	4120	4724
4727	3010	2010	4971	4130	3015	5034	2010	4020	4978	4977	4115	4145	5146	5203	4721	5310	4978	4145	4114	4150	4950	5144	3010	190	4512	4145	4110	4742	4727	4974	4971	4650	4146	4727	5146	4744	5310	4145	4630	4950	3022	4020	4130	4971	4610	3460	4512	4330	520
4650	5203	970	4380	4020	4621	4120	4725	520	230	4670	5169	4270	4810	4145	5010	4724	5034	4110	3050	5010	5203	3010	4950	4270	4975	5203	4727	520	3320	4020	5010	520	5146	5150	4640	5010	4380	4670	4727	4650	4380	5203	514	5203	3050	4650	4725	4512	4744
4120	4810	5205	4610	4110	4726	4512	4640	4270	4020	4725	4130	4380	4512	4970	5310	4918	4512	4978	4670	5146	4130	4145	4744	230	5034	4512	4971	5016	4978	4810	5146	4640	4512	4728	4977	4971	4744	4950	4971	4110	5016	4970	4650	4950	4141	3022	4970	4975	4380
4142	4630	4062	4975	4970	4727	4975	4950	4976	4146	5205	4330	4727	5012	2010	4330	5146	4727	4144	5310	4130	4810	120	4120	4976	4970	4975	4130	3460	4650	5203	4725	4512	4380	5144	5016	4142	3013	4060	310	4630	5203	4810	3060	4020	3015	4330	310	4725	4726
4110	4950	4971	4270	230	4725	310	5205	4950	5310	190	4744	190	4115	4020	4971	4650	4971	3050	4330	4725	4020	4724	5205	5202	4950	4630	4120	4146	5016	3320	4514	4725	4330	5032	2010	4115	4020	3050	5016	4380	310	4950	4742	4725	5310	4978	3410	5146	4670
4725	3320	4810	4630	3022	4650	4141	3320	4650	4971	5203	4975	2010	5310	4110	4724	4670	4976	4950	4310	4724	4145	5146	190	4727	5203	4380	3460	4650	4742	190	4145	4150	4971	5168	4145	4725	5146	4974	4950	5016	4978	4390	520	5016	4670	4360	4742	2010	3015
4950	4742	4950	4978	5016	5310	4650	520	4110	4744	4020	4918	4918	5144	4142	4726	4971	190	4270	4726	4977	3320	4350	4110	2010	4020	4020	4650	4640	4976	2010	4115	4115	4727	4975	3050	4010	2010	4390	4390	4640	5146	520	4974	4650	4115	4390	2010	4020	4918
5205	4970	3015	4950	4810	4744	4810	4145	5205	190	4950	514	4141	3040	3015	4650	5169	4725	5016	4512	2010	4650	4080	4650	4971	4650	4970	4270	4110	310	4310	4950	4130	4142	5014	4062	4975	5034	5016	4062	3410	4950	4110	4975	310	4918	3008	4640	4360	4971
4971	4120	4310	4010	4640	4330	5203	4978	3320	3320	4727	4390	4726	4975	4640	5146	4725	4020	4971	4724	4744	4390	4725	4146	4630	4514	5146	4950	3320	520	4145	4512	3022	4270	4971	4310	4145	4975	4512	4020	4145	4010	2010	3410	4145	4530	2010	4390	3015	4975
4630	3410	4970	4141	520	4810	3010	4062	4142	4977	4650	4977	4640	4974	4390	4744	4950	3460	4146	2010	4512	3460	2010	3015	520	310	4950	4390	4145	3015	4390	4380	4724	4110	5310	4650	4640	4724	4650	970	3015	2010	3410	4330	4970	4975	4970	5016	970	4725
3015	520	3022	4110	4062	4975	3015	4120	3015	4726	4640	4971	4971	4910	5016	4630	5203	5205	4062	4971	5034	4976	310	4060	4742	2010	4742	4062	4810	4640	230	4650	3320	5016	4724	4742	4390	4640	4640	4640	3008	4971	3015	4977	4120	4726	3320	3015	4971	4610
3018	190	4640	4650	4310	4390	4270	4970	5016	4110	4062	4512	4330	4918	4742	3320	4130	4810	3320	4145	4670	4640	5310	4270	4062	4810	4390	3410	5205	5205	4640	4630	970	4010	4080	970	4062	4974	4146	4010	3050	4725	4742	4918	4974	4744	4976	4110	4950	4727
4010	4110	3410	4970	310	4512	2010	3015	4640	4810	2010	4724	3022	4971	4976	514	3410	4970	3013	3320	5203	2010	4330	4970	3410	3320	4650	5205	310	4110	4650	4010	4390	4640	4911	4976	4270	4725	2010	4742	4062	230	3320	3050	4390	4020	5016	520	4974	4390
1100	4062	4020	4976	5205	4020	190	4740	4742	4630	4610	4727	4130	4724	4310	4977	5034	4640	4970	3460	4380	5016	4270	4020	310	4062	3015	4742	3050	4145	3410	4330	4950	4020	4976	4141	4978	4512	3410	3460	4970	190	5205	3460	4640	4380	4810	3460	3410	4020
2010	4310	310	3320	4742	4010	5205	310	3050	4725	4145	2010	4390	4670	4146	4975	1100	4950	310	4974	4650	4310	4975	4640	4974	4142	2010	4970	4062	4120	5016	5202	4062	3015	5203	4810	4141	5203	4010	2010	4390	4810	4062	5203	3050	4640	4640	4142	4742	2010
4390	4145	3013	4310	4976	3010	3013	5016	4146	4975	520	5146	4950	4744	4062	4725	190	4146	4650	4727	4950	4062	4650	310	4640	4976	4062	4976	4970	4062	4742	4975	3410	310	4918	3410	4020	4330	4062	4810	4742	4640	3050	3022	3018	4971	4020	970	3013	4080
4062	4976	4390	4742	3320	4630	3018	4514	4390	5034	4742	310	5016	514	3050	4950	4062	3050	4010	4020	4146	3410	4670	4062	970	5205	4310	4640	4976	4974	4062	4360	4976	3050	4744	4970	4110	4950	4970	4145	4146	3320	4976	4970	4062	4725	4310	4062	4514	4950
4640	3015	4145	4390	3050	190	4950	4976	4062	4950	3015	230	4146	4270	3018	4976	3013	4062	4640	3040	4390	3050	4971	3008	3320	4640	4130	3015	4310	4970	4976	2010	5202	4610	4145	310	310	3050	4976	3018	3013	4514	4640	4950	3320	4270	4062	4145	230	5203
970	4514	520	4974	4610	4110	4610	3410	4970	2010	3410	4950	3040	230	4810	4080	3015	230	3015	4950	4062	4142	4744	3320	3050	3050	4120	4360	4390	4141	4610	3320	4145	4062	4130	230	4650	4010	970	3050	4976	4120	4120	4670	4742	4950	4742	4976	4062	4640
4976	4640	3320	4640	4010	4950	4976	4810	970	5202	4390	4640	4742	4727	230	4512	5202	3410	1100	3018	3015	4360	4390	4010	4970	4742	520	4974	4360	4810	970	520	4970	4970	3060	4390	4742	4810	230	4060	970	4145	5016	4514	970	4976	4974	4974	4640	4120
4742	4610	4010	970	4974	4974	4640	3050	3018	4360	3018	4020	3015	4742	4974	4110	2010	4010	4742	4270	4145	4146	4640	230	4810	4974	4640	970	4514	4514	4970	4640	3015	4742	4970	4010	970	3320	4742	4120	230	4062	3008	4146	4514	5205	3050	3008	4810	310
3008	4974	230	3015	4514	2010	4060	5202	4514	4610	3010	5205	3320	4130	3008	4142	3018	4742	4976	3008	4640	4742	4950	4742	4141	230	3410	5202	230	4146	4060	4062	4010	4976	4142	3320	4976	4062	4141	4142	4974	4970	970	4640	4010	4514	230	4120	4010	4062
4060	4146	3050	4146	1100	4640	4970	4010	4310	4650	230	4270	4974	4330	970	4640	4976	4360	3010	4810	3320	4120	4062	4976	4145	3040	5202	3013	970	1100	4360	4974	3050	230	4670	4142	5016	4390	4120	4310	4144	4610	4514	3015	3015	3320	4610	3050	3018	4650
4974	970	4146	4062	4144	4062	3050	4080	230	4062	4974	4514	230	4062	4610	4062	4742	4310	4610	310	4010	970	520	3040	1100	4360	4360	3018	3018	3050	3018	4742	4742	4514	4725	3018	4610	4742	4360	3015	4360	4974	4974	4080	230	4390	4120	230	3320	3050
3320	230	4742	4142	3008	4742	3410	230	5202	4640	4810	4062	4970	4950	4514	4810	4310	970	3008	4062	4742	4010	190	4974	4310	4146	4976	230	4142	970	4514	4976	4974	970	3410	4610	4974	4976	4310	4360	4310	3018	4610	4976	4141	4970	3018	4310	4976	4145
4145	3008	4514	3018	4120	3018	4142	970	3008	4010	4141	4742	520	3410	4120	4310	4640	3013	970	230	4976	4144	230	970	4120	3013	3008	4144	3010	230	3010	970	4610	3018	4810	4974	230	520	3018	230	3018	4310	4144	4062	4144	3013	3013	4514	4146	3018
4141	3018	4120	5202	4360	4976	4062	4144	3040	4976	4310	4976	4062	3460	3040	4742	4120	4610	4142	4742	4514	4610	4742	4310	3040	970	230	3040	5202	3018	3008	3050	4310	5202	4270	3013	3320	4060	4610	4514	4120	5202	4360	3320	4142	4742	4514	4740	4390	4970
4310	4360	4610	4514	4080	970	4010	1100	4360	3008	4976	4310	4360	2010	4360	4610	4141	4514	4120	4970	3050	4514	3050	4514	4514	4310	4610	4514	4141	4360	4120	230	4514	3010	4062	4514	4970	3015	3008	3008	4610	3040	3040	4610	4610	3018	4141	4144	5202	4974
4514	4142	5202	3008	3018	4514	4514	3008	4060	4742	4514	4970	1100	4640	4141	3015	4970	3040	4514	4640	4310	4740	5205	3018	4142	4610	970	4610	4120	3008	5202	4060	4142	4360	4310	4120	3050	4310	4142	4141	4514	4060	4141	3040	3008	4974	5202	4360	4610	4810
4610	3040	4142	4360	4060	4610	4974	4142	1100	4514	4060	3008	4120	4970	5202	4974	970	3018	3018	4976	4120	5202	4970	4360	3008	3008	4514	4142	4144	4740	3013	4610	3008	4144	4640	4360	4514	970	5202	4144	3040	4740	5202	4120	4360	4062	4144	4610	4310	4742
4360	5202	3040	4144	5202	3008	4360	4060	4141	970	4142	4610	4514	3015	4740	970	4142	4142	5202	4120	4610	3013	4514	4610	4360	3018	4142	4141	3040	3040	3040	4310	4360	3040	4950	3040	3010	4514	3040	5202	4141	4360	4740	4142	4740	4144	4060	3013	3040	3040
4144	4060	4740	4060	4141	4740	5202	4141	4740	3013	4360	4120	5202	4310	4060	4514	4610	5202	4360	1100	3013	3040	4974	4142	3010	4141	4740	4060	4740	4142	4144	3013	3013	4141	4144	4740	4360	4610	4740	3040	4142	4144	1100	4144	1100	4360	3040	3040	4142	4310
4740	4740	4060	3040	4740	3013	4144	4360	3013	4310	5202	3040	4080	4142	3013	4060	4360	4740	3040	4610	4142	4060	4310	3013	4060	4060	3013	4740	4060	3013	4141	3008	4740	4740	4610	4060	4060	4142	3013	3013	4740	3013	4060	4060	3013	4142	4740	4060	3008	4142
5202	4141	4141	4740	3040	4060	4740	3040	4144	4060	3013	4141	4060	4610	3010	3008	4740	4060	4740	4740	3010	4141	4120	4141	4740	4740	4060	3010	3013	4060	4740	3010	4060	3013	4120	1100	4740	4360	3010	4740	4060	3010	3013	4740	4060	4060	3010	3010	4060	4360
3040	3013	3010	3013	3013	4360	1100	3013	3010	4740	4740	4740	4740	4144	1100	3013	4060	3010	4080	4141	4740	3010	3040	4740	3013	3010	3010	1100	1100	3010	1100	4740	4080	1100	4742	3010	3013	4740	4080	1100	3010	4080	3010	3010	3040	4740	1100	4080	4080	4740
4080	4080	4080	4080	3010	4080	4080	3010	4080	4080	4080	4080	3010	4740	4080	4740	4080	4080	4060	4080	4080	4080	4740	4080	4080	4080	4080	4080	4080	4080	4080	4080	3010	4080	4740	4080	4080	4080	1100	4080	4080	1100	4080	3013	4080	4080	4080	1100	4740	1100
[truncated: 1,119 more columns]
